# Supplementary material
Source: PubMed Central journal article supplement (PMC1087798)
Supplement: eukcell_4_3_545__1.pdf [file eukcell_4_3_545__1.pdf]

# Supplementary Figure 1

|                   | 10          | 20          | 30         | 40                       | 50         |
|-------------------|-------------|-------------|------------|--------------------------|------------|
|                   |             |             |            | <b>A1</b>                |            |
|                   |             |             |            | <b>LTy<del>x</del>EL</b> |            |
| <b>Consensus</b>  |             | P A         | D-G-----   | TY L                     | S LA L     |
| <b>NPS1 mod1</b>  | ELFAEQAKAR  | P-TAPALCAW  | D-G-----   | EMTYDELDRL               | SSQLANHLIH |
| <b>NPS1 mod3</b>  | ELFAEQAKAR  | P-SALAICAW  | D-G-----   | EMTYSELARQ               | STQLAGYLVN |
| <b>NPS3 mod1</b>  | DLYIEQAKVR  | P-NAPAICAW  | D-G-----   | EMTYKQLDEH               | STQLAGYLAG |
| <b>NPS3 mod3</b>  | DLYLEQVKSQ  | P-KADAVCAW  | D-G-----   | RMTYEELDET               | SSRLAHHLIS |
| <b>NPS4 mod1</b>  | DRFSQWADRQ  | P-DAQAICAH  | D-G-----   | EYTYAELEV                | TDRLAHLVQ  |
| <b>NPS4 mod2</b>  | DVIQEDQSAR  | RPTASAIIDAW | DTG-----   | VMSYQELDER               | ATALAYRLTA |
| <b>NPS4 mod3</b>  | KVIHDQALTR  | PRMTKAVEGW  | D-G-----   | SFTYQEFDR                | TDQLAAHLQS |
| <b>NPS4 mod4</b>  | AVFQKKVTAQ  | -PDAVAVAAF  | D-G-----   | ELTYAELARY               | STNLAQELID |
| <b>NPS5 mod1</b>  | SLIENTAKCQ  | P-DALAVDAW  | D-G-----   | AMSYERINEL               | STTLANEIMQ |
| <b>NPS5 mod2</b>  | ELIQESVQRQ  | P-ASTAVCSW  | D-G-----   | ELTYEQLDRF               | SSGVACRLVS |
| <b>NPS6 mod1</b>  | EKVSERAALH  | P-EKIAIDAW  | D-G-----   | TLTYGQIEDY               | SDKLAKLLRL |
| <b>NPS8 mod1</b>  | GLFDIQLRKR  | P-EVMAVCAW  | D-G-----   | SLTYSQLDKY               | STLLAFHLLD |
| <b>NPS8 mod2</b>  | EIYAVALQNW  | N--QPAVCAW  | D-G-----   | EISYGELEQM               | STRVANNLRE |
| <b>NPS9 mod1</b>  | RLIELSVQKM  | P-QATALISR  | D-G-----   | EMTYTEFDQA               | ACRLAKYLEQ |
| <b>NPS9 mod2</b>  | HLVKKQTMRQ  | P-NTPAVCSW  | D-G-----   | DVTYAELDYY               | SSKLAVHLLD |
| <b>NPS2 mod1</b>  | DLLHQLVPR   | HHDANAIDFL  | EHGS---KRR | KFSYTTLHSL               | SDAFAARITE |
| <b>NPS2 mod2</b>  | HAVEKWAATD  | PHRTAIFGH   | EVNGSIKVKD | TMTYSMLNSR               | ANQLARLLAE |
| <b>NPS2 mod3</b>  | SGFERTALLH  | PDRIALDFWH  | SQG---KKT  | TWSFEQLNRE               | ANQIAHALIR |
| <b>NPS2 mod4</b>  | ELVEKTAQEH  | PQRIAFEFVS  | KESSGKRPVR | KWTYRELDQE               | GNKIAQLLAA |
| <b>NPS1 mod2</b>  | DVFREQAAAW  | SSKVAIKDTR  | G-----     | EMTYDQLDIQ               | SDRLAQALTT |
| <b>NPS3 mod2</b>  | DLFHQQVSIC  | PSRIAVKDPL  | R-----     | EMTYAQLDKE               | SEVLSWLLAK |
| <b>NPS3 mod4</b>  | DVFRQQVAMQ  | PSRIAVIDAF  | T-----     | ELTYTELDAQ               | SEKLAKYLAT |
| <b>NPS7 mod1</b>  | RLLQQTAEERH | CDKIAMICGD  | E-----     | KVTFKTLATL               | ATQLARILVN |
| <b>NPS11 mod1</b> | EAFEKIAETH  | PHTVAATFAG  | N-----     | SLTYQQLDEA               | ANQLANRLIH |
| <b>NPS10 mod1</b> | ALFSQQVQAT  | PNLVALEDDK  | N-----     | TYTYQELHDK               | VAALADRLRG |

60 70 80 90 100

**A2**

**L KAGAAFVPLD P**

|                   |            |            |             |             |             |
|-------------------|------------|------------|-------------|-------------|-------------|
| <b>Consensus</b>  | - G--      | V F KS     | VA LA L     | KAG A VPLD  | P P R       |
| <b>NPS1 mod1</b>  | NLE--VKPED | IVPLCFEKS  | WTIVAILAVL  | KAGGAFVPLD  | PDHPASRHEE  |
| <b>NPS1 mod3</b>  | -LG--VGVED | IVPLCFEKSI | WTVVAMLAVL  | KAGGAFVALD  | PDHPTS RHKM |
| <b>NPS3 mod1</b>  | -QG--VIAEE | MVPLCFEKSQ | WTVVAMLAVL  | KAGGAFVPLD  | PSHPRS RHEE |
| <b>NPS3 mod3</b>  | -LG--VESES | IVPLCFDKSI | WVVVAMLAVL  | KTGGAFAPLD  | PNHPTS RHRE |
| <b>NPS4 mod1</b>  | -LG--VRPET | FVATCFDKSM | FAIIAMLSVI  | KAGGAAVPLD  | AAHPVNALQT  |
| <b>NPS4 mod2</b>  | -LG--VKPRQ | FVPLCFDKSG | WTIVAILAVL  | KTGAAFVPLD  | FEAPVLRLE   |
| <b>NPS4 mod3</b>  | -IG--IKTET | FVPILFEKSS | WAIVSMIAIM  | KAGGAYVPLD  | PKHPQTRLRE  |
| <b>NPS4 mod4</b>  | -LG--AGPET | LILICLDKSL | WTIVAMMGII  | MAGAAYVPLS  | PEHPPSRHEQ  |
| <b>NPS5 mod1</b>  | -LG--IGPGL | AIPLCFEKSA | WYTVALLAVL  | KSGNAFVPVD  | RSNPTNRICQ  |
| <b>NPS5 mod2</b>  | -SG--VQPEH | VVALCFEKS  | WGIVAMVANN  | KSGGTFVHID  | PQAPRARVQA  |
| <b>NPS6 mod1</b>  | -LD--DSSNR | IIPVLFEKSR | WTSVAVLAIM  | KSGACFALLD  | PAQPEGRLRA  |
| <b>NPS8 mod1</b>  | -QG--IQPGS | IVALCFEKS  | LMPISMLAVA  | KAGITGLGID  | PDQPEGRLAQ  |
| <b>NPS8 mod2</b>  | -QG--IGRGH | IVPICFEKS  | WMPVAALGVM  | KAGAAVVALD  | ITLPVQRLQV  |
| <b>NPS9 mod1</b>  | -AG--IRRGQ | LVPICFEKSP | GAVITMVALW  | KLGAAYVPLD  | PAHPLQRLQA  |
| <b>NPS9 mod2</b>  | -IG--VGAKD | FVPICFEKS  | WVIVAILGIM  | RAGGAFVPLG  | PDTPYSRLVM  |
| <b>NPS2 mod1</b>  | ILGKLESASS | IIPVFLPQSP | ELYVVLLAIL  | KAGKAF CPLN | LDTPTERLKF  |
| <b>NPS2 mod2</b>  | -HG--VTNDQ | LVCIIMEKSV | NLYTCILAVL  | KLGC GYLPLV | PDTPIDRVKT  |
| <b>NPS2 mod3</b>  | -AG--AWPDQ | VIPIHISKSP | IYYASILGVL  | KSGAAFAPVH  | PDLPEARQL   |
| <b>NPS2 mod4</b>  | -HN--VKQNS | LVGVCFDKCP | EASFAMLGIL  | KAGCAFVAID  | PGAPAARQTF  |
| <b>NPS1 mod2</b>  | -RA--LTPET | AIGVLALRSC | ETIVAF LGIL | KAGLAYVPLD  | AKSPAERTES  |
| <b>NPS3 mod2</b>  | -QS--LAPET | LVGVLAGRSC | QTIVAF LGIL | KAGLAYLPFD  | VKLPAKRMET  |
| <b>NPS3 mod4</b>  | -KS--LALET | AVGVLAHRGC | EAIVAFFGIL  | KAGLAYLPFD  | SKAPEKRMES  |
| <b>NPS7 mod1</b>  | -RG--IGRGE | VVGIALDRSI | DLVVALLAVM  | KTGAAYMPID  | PGFPTDIRH   |
| <b>NPS11 mod1</b> | -TG--LKPKQ | RVCLVVQRSF | EMLIGIFAIL  | KAGCQYVPVD  | GGVASEVALT  |
| <b>NPS10 mod1</b> | -HG--VGRDS | LVGVLLPRSA | DYVIACLAAL  | RAGGAFLVLE  | LAYPPDLLAD  |

|                   | 110         | 120        | 130         | 140         | 150        |
|-------------------|-------------|------------|-------------|-------------|------------|
| <b>Consensus</b>  | I --- L     |            |             |             | ----       |
| <b>NPS1 mod1</b>  | IFKQT----E  | AKLVLTSVQH | AMLWDPD--A  | RHVVPIGEAF  | V----SQLSS |
| <b>NPS1 mod3</b>  | ILKQTFKQRD  | AKVVLTSVQH | ATMWKDLDLA  | GNVVAVSEAL  | I----SRLP- |
| <b>NPS3 mod1</b>  | IFKQT----K  | AKVVLTSVQY | ANLWPNS--T  | QRILAVSNAF  | I----NQLS- |
| <b>NPS3 mod3</b>  | IFDQT----K  | AKMILSSTQY | ANLWPES--S  | QIVVPISRDF  | I----DQLPA |
| <b>NPS4 mod1</b>  | RLEDA----A  | SKIVLTTTAR | AEKFEGE--V  | DNIIIVDDSL  | L----QSLPA |
| <b>NPS4 mod2</b>  | IVG----DVG  | AELLLCAPQY | EELCESIPCR  | AQVVDRQ-ST  | -----IYDKP |
| <b>NPS4 mod3</b>  | LIE----DVG  | ADVVLCSRK- | YQATASEVSK  | TPLVVDQRSI  | R----KLATP |
| <b>NPS4 mod4</b>  | IIE----TCN  | SSIMLCSPSY | KSRFEALVKH  | VRTITED-SI  | R----KLPTP |
| <b>NPS5 mod1</b>  | ILRQLDIDVN  | SGLVITSREH | VQTFVPLCKH  | VIPLEPNFFA  | K----EKTYT |
| <b>NPS5 mod2</b>  | ITE----QTR  | CKVALVALSC | HTLLDDLVDG  | VLLLTSHAAE  | E----WCSMD |
| <b>NPS6 mod1</b>  | VVQ----QVN  | AKIFLSSKAQ | STLAARVAPA  | ATIIPISKSK  | FNKIFSPYTA |
| <b>NPS8 mod1</b>  | VVT----ESK  | AAALLCSLRH | HELSSRLG-A  | KKALPLGLDD  | L----SLMQL |
| <b>NPS8 mod2</b>  | ITK----QVQ  | SDIILASLAQ | TDLAGRLG-F  | AKLLVLPNHD  | E----QPKEP |
| <b>NPS9 mod1</b>  | VISIV----E  | ADIAIVSASN | KILVQDI--V  | RRVITVDPTL  | L----SATDV |
| <b>NPS9 mod2</b>  | ATR----EVG  | AHFMVCSKKQ | LHRFPDLVDR  | TVPIGPGFNA  | L----VINTP |
| <b>NPS2 mod1</b>  | ILD----DIS  | ADIIITFESY | SEHIRTATNI  | HVVSANRELS  | G-----CHDT |
| <b>NPS2 mod2</b>  | ILN----DAQ  | IAVCMSELSL | SATLRSHLSV  | DIIDFDLAAL  | SD---YCDRN |
| <b>NPS2 mod3</b>  | MFK----DLK  | PKIILCDD-- | GSLLPEDLPD  | VTVLITQSMS  | SD---DVSNP |
| <b>NPS2 mod4</b>  | IIE----DSD  | AQAVLSMSSQ | SAQFNIAIKV  | PVLNLDEVEW  | CS---LSGQK |
| <b>NPS1 mod2</b>  | ILSS----FQG | QRLVLVGMDV | EIPVLTSENV  | EFVRIADMLN  | GATDNSLVRG |
| <b>NPS3 mod2</b>  | ILSS----LPG | QKIVLFGTDV | EPPKLIKIGDV | RFVRIAETL-  | -D---EQIRK |
| <b>NPS3 mod4</b>  | ILST---IDG  | KKLVLVGPNI | RLPGAGLEDV  | EFAHIVDILN  | VDDNAEFIRR |
| <b>NPS7 mod1</b>  | MIED-----A  | SPILVIVGAS | TRLASQSWG   | ATLDELDETRD | K----MADSE |
| <b>NPS11 mod1</b> | HILS---DSG  | ATFILCLPKF | VERTQKVAKQ  | DAVIALEAN   | -----VGAS  |
| <b>NPS10 mod1</b> | VLE----DSQ  | PTVIVTVSAE | VGKIKGSIPL  | VVLDETSSEK  | N----GQLDE |

**A3**

**LAYVIF TSGSTGxPKG V**

| Consensus  | -          | AY         | F          | TSGSTG     | PKG         | V | H |
|------------|------------|------------|------------|------------|-------------|---|---|
| NPS1 mod1  | TENMK-EATV | NPSNTAYIMF | TSGSTGIPKG | VVLEHRAVST | SCLSHGKAIG  |   |   |
| NPS1 mod3  | SSEID-GSRV | QPHNTAYIIF | TSGSTGVPKG | IILEHKALST | SCLGHGRAFG  |   |   |
| NPS3 mod1  | AETKV-CSKV | EPWNAVYVMF | TSGSTGVPKG | VVLEHGAIIT | SCLAHGKSMR  |   |   |
| NPS3 mod3  | KPYDA-QIAV | QPGNTAYIIF | TSGSTGVPKG | VQLEHKAVST | SCLYQGPALG  |   |   |
| NPS4 mod1  | VRSPI-NTGV | QPHHPVFVIF | TSGSTGRPKG | VVLEHSAMVT | SAEAHGSKIG  |   |   |
| NPS4 mod2  | -SLPC-LPSV | DSNDPAYAFY | TSGSTGKPKG | AVVNHVHWVT | SSTAFAPGWK  |   |   |
| NPS4 mod3  | DSSAL-LAAA | TPENAAYCLF | TSGTTGKPKG | TIISHRAFCT | SAAAFTRRMN  |   |   |
| NPS4 mod4  | -EAPL-PQKI | KSNNACYVLF | TSGSTGVPKG | AVIEHRNVTS | NAIAISEGSH  |   |   |
| NPS5 mod1  | --RFN-MPEV | SAHDKAYVIF | TSGSTGMPKG | VVVEHGAYAY | AARAHQGGLH  |   |   |
| NPS5 mod2  | VASLA-TVQH | KPTNALYVIF | TSGSTGTPKG | VVIEHQNFCS | AVIANREWLQ  |   |   |
| NPS6 mod1  | EQPNTTLPPV | SPDQPLYIQF | TSGSTGVPKG | CILTHSQYTS | GAIPRAAVG   |   |   |
| NPS8 mod1  | DDTRS-LPTV | KSSDILYAVF | TSGSTGKPKG | VLVSHGSYSA | AAICQHEPFG  |   |   |
| NPS8 mod2  | AQIDG-AVAS | SPDDLLYIVF | TSGSTGTPKG | TMLTHSHVCS | MLHHQREIIG  |   |   |
| NPS9 mod1  | VFE----SRS | QPRDTAFVIF | TSGSTGRPKG | VVHVHSAVCS | SALRHGPAMS  |   |   |
| NPS9 mod2  | MPVLL-LPAV | TPTGAAYVMF | ISGSTGMPKG | IVMEHQVFCT | SALCHKEGL-  |   |   |
| NPS2 mod1  | FHHHS--PHL | SPDNLAYVLY | TSGSTGLPKA | VSVSHRAVTQ | SLLAHDPHIP  |   |   |
| NPS2 mod2  | LEIP-----Y | NGQHLAYAVF | TSGSTGTPKG | VLVTQDNLMS | NLHYLSTIYP  |   |   |
| NPS2 mod3  | IIED-----L | KDTNLAYCLF | TSGSTGVPKA | VSMEHCAPIQ | TIESSRTIIP  |   |   |
| NPS2 mod4  | LLQNS---VI | DPQDRSYCLY | TSGTTGTPKG | CELTHENAVQ | ALLAFQRLFA  |   |   |
| NPS1 mod2  | TLEGNHSLGP | SANSIAYIIF | TSGSTGRPKG | VMVEHRGIVR | MAQ-HDRITD  |   |   |
| NPS3 mod2  | PSDSGNIVKP | SATSIAYVMF | TSGSTGQPKG | AMIEHRGIVR | LVRDNNFVQH  |   |   |
| NPS3 mod4  | ELDP--ALKP | SPSSLAYILF | TSGSTGQPKG | VMVEHRGIVR | LAQ-HDQMEH  |   |   |
| NPS7 mod1  | SQISSVDTDP | ESEDLAYVIY | TSGSTGKPKG | VEISHGALSN | FLCAMQREPG  |   |   |
| NPS11 mod1 | FPSTRPSVPV | SQHDGAYAIY | TS-STGTPKG | VDVAHSNVTN | ALLLNPARLD  |   |   |
| NPS10 mod1 | SDLKPLPEET | DLERLAFVSY | SSGTTGKPKG | IANPHKAAVL | SYNLRFGGLSD |   |   |

210 220 230 240 250

A4

FDxSxxxE

```
Consensus -- R L QF ----- YTFD** *E L G
NPS1 mod1 --LKPDTRAL QFAT----- YTFDACCIAEI ITPLLHGSCI
NPS1 mod3 --MSHNTRVL QFST----- YTFDASMAEI VTTLVHGGCL
NPS3 mod1 --LGPNSRAL QFAA----- YTFDICIAEI FTTLIFGGCI
NPS3 mod3 --ITKNTRAL QFAA----- YTFDACILEI ITSLLHGACV
NPS4 mod1 --LDHSSRML QFAS----- YTFDNSLEEM FTTLQRGGCV
NPS4 mod2 --ISETSRIL QFAS----- YTFDACLIEI FTTLMNGGTV
NPS4 mod3 --INATSRTF QFAS----- YTFDASCIEI LSALTVGATV
NPS4 mod4 --LTPTSRVI QFST----- LVFDASVLEI FVTLLLGATV
NPS5 mod1 --ISNTRSVL QFAS----- YGFDTSMEDH LTTLIVGGCL
NPS5 mod2 --IQATSRVL QFTS----- YSFDASLEET FTALVAGACI
NPS6 mod1 --YYPHSRVL DFAS----- YAFDVCIDSM LCTLAHGATL
NPS8 mod1 --FSQEARVL DFSS----- YAFDAAWFNL MHTITSGGCL
NPS8 mod2 --LTSGRRVY NFAS----- YAFDVAWDDF FHALTSGGCL
NPS9 mod1 --ISQATRAL QFGS----- YTFIVSTFEL FTPLIFGGSI
NPS9 mod2 --LNEES-VL KFTS----- YMFDASIVEI PFKLLHGGCV
NPS2 mod1 --AFS--RFL QFAAPVSASF EPFFAMLTQ KTFDVSIFEI FFPWFRGKTL
NPS2 mod2 --FSADSRL L QACS----- QAFDVSVFEI FFTWYVGICL
NPS2 mod3 --WNPQSRL L QYAA----- VTFDMCYDC FLSWTFGFAL
NPS2 mod4 GHWDVDSRWL QFAS----- FHFVDSVLEQ YWSWSVGICV
NPS1 mod2 --FQSTKATA HMAN----- LAFDGSSWEI YTCLLNGGTL
NPS3 mod2 --LPASPVMA HMTN----- LAFDVSTWEI YASLLQGGTL
NPS3 mod4 --FRSSEATA HMAN----- LAFDGSSWEI YTCLLNGGTL
NPS7 mod1 --CAETDRLL AITT----- ISFDIAALEV FLPLLCGATM
NPS11 mod1 --ITVGSKVA QVLN----- IAFDMG--KL YKKFRRKLPN
NPS10 mod1 --LQPGDRVA CNVF----- ----FVWEI IRPLLRGATV
```

|                   |             | 260        | 270         | 280        | 290         | 300    |
|-------------------|-------------|------------|-------------|------------|-------------|--------|
| <b>Consensus</b>  | C P         | -- L       |             | A* TP V    | --          | P ---- |
| <b>NPS1 mod1</b>  | CIPSEDDRQN  | --ALPEAINT | MNVNWAQLTP  | TVARLLD--- | PQKTPS----  |        |
| <b>NPS1 mod3</b>  | CVPSESERRD  | --GLAEAMNK | MDVNWAMLTS  | SVARLLD--- | PKSIPS----  |        |
| <b>NPS3 mod1</b>  | CIPSEDDRRN  | --ALSEFINN | RNVNWAQLTP  | TVARLLD--- | PLTVPT----  |        |
| <b>NPS3 mod3</b>  | CIPSESQRRD  | --NLIDTINA | MEVSWALLTP  | AVARILD--- | PXKIVS----  |        |
| <b>NPS4 mod1</b>  | CVPSEVDRVN  | --DLAGVVTR | LNVNIMDLTP  | TVASLLS--- | PKEVPT----  |        |
| <b>NPS4 mod2</b>  | CVPDQAARTN  | --DLVGAINQ | FNVNWAALTP  | SVVRTMT--- | PSQVPH----  |        |
| <b>NPS4 mod3</b>  | CVPSEDDRMN  | --NLAGAIRK | LKANWSLLTP  | SVLGTVE--- | PERVPC----  |        |
| <b>NPS4 mod4</b>  | CVPSEEKRTA  | --DLASALTS | LKADWAFMTP  | SVASTLDG-- | PQSVPT----  |        |
| <b>NPS5 mod1</b>  | CVPSEEEERLS | --DLVGFANR | SKANWAHLTP  | SVANIFN--- | AEETPV----  |        |
| <b>NPS5 mod2</b>  | CVPSEQDRMS  | --DVTGFIQR | AAVNWAAFTP  | SFLRSLE--- | PHDVSS----  |        |
| <b>NPS6 mod1</b>  | CTPSDERRMN  | --DMSGAMRD | MQVTFAGMTP  | SVARTLEV-- | DILNN-----  |        |
| <b>NPS8 mod1</b>  | CVPSTDDLRLN | --HLGGCILQ | FGVTF AFLTP | TVCRGIER-- | KALIH-----  |        |
| <b>NPS8 mod2</b>  | CIPSEEDRKN  | --NIETSMAM | LRANYVHITP  | TILRHIDW-- | SKATG-----  |        |
| <b>NPS9 mod1</b>  | CIPSEQDRQT  | --DIQSALRA | FKVNWAIFTP  | SFARSLS--- | TEDTP-----  |        |
| <b>NPS9 mod2</b>  | CVPSEEXRRG  | --YLAEAYCS | MKVNWAVLTP  | PSPSTVD--- | PGSAPL----- |        |
| <b>NPS2 mod1</b>  | VGCTRTQMLD  | --DLPGTIAS | LDVDAAELTP  | TVVSSLLSG- | RSSVPG----- |        |
| <b>NPS2 mod2</b>  | CSATKEHLFR  | --DFEAAIDQ | LKVTHLSLTP  | TVAALVD--- | PKNVP--K--  |        |
| <b>NPS2 mod3</b>  | CAAEQSDLLN  | --DLSGVIKT | LEADLLDLTP  | SVAETLK--- | RADVP--N--  |        |
| <b>NPS2 mod4</b>  | VSAPRDLIFE  | --DLAGSIRD | LNITHIDLTP  | SLAQILH--- | PDDVPSLC--  |        |
| <b>NPS1 mod2</b>  | VCIDANTVLD  | QDALLEVFTR | HSIRIAFFTP  | ALLKLSLA-- | ASPRTIGA--  |        |
| <b>NPS3 mod2</b>  | VCIDRMTVLD  | PEAVLRTFRR | EQVQTAFMTP  | SLFRTYVQ-- | QSPAMFAN--  |        |
| <b>NPS3 mod4</b>  | ACIDATTVLD  | QDALLRAFRE | YKIRIAFITP  | ALLKYILA-- | ESPDTIGN--  |        |
| <b>NPS7 mod1</b>  | IMAQAHEVKD  | PEATLSLIQQ | HDITMMQATP  | ATWQMLLDA- | GWKGDP-R--  |        |
| <b>NPS11 mod1</b> | KWPGAWEILA  | CLMNGGTYLY | RGSDWTATLR  | EVSDILSKYR | RQSFPN----  |        |
| <b>NPS10 mod1</b> | VAVPDDVSYD  | PRMLVDLLAS | KKITETLFTP  | TLFSAVLAC- | HQALATRLPN  |        |

310 320 330 340 350

A5

NxYGPTE

```
Consensus L L* *GE W ---- N YGPTE ** ----
NPS1 mod1 LRTLVLGGGER VNAVDWERWG ----DSVEQI NAYGPTECAV WCTSYP-----
NPS1 mod3 LKTLVLVGEQ VTPADWNRWP ----HSVQMI NGYGPSECCI ICTCHA-----
NPS3 mod1 LKVLVLGGGER VDDADWKRWD ----GNVAQI NVYGPTECSI WCTSHE-----
NPS3 mod3 LKTLVLGGEEK VNASDCEIWS ----DRVQLI NAYGPTECCV SCVANP-----
NPS4 mod1 LKRMCLGAEP LTKALIELWS ----PHVPVF GQYGPSEASI NSAFKD-----
NPS4 mod2 LKTLFLVGEA MSQQDLTTWA ----DKVTLG NGYGPTECAC VATCNIMTP-
NPS4 mod3 LKTLVSGGEA LPHILKKWG ----TSTCFI NAYGPTECAV VAATAYKSTL
NPS4 mod4 LKTLTVGGEA ITTEVINKWA ----SGVKLL NVYGPTECCI FALTNDKVR-
NPS5 mod1 LKTMVLGGEA MTLRNVQAWA G--RPNKRLI QVYGPSECCV TSTIS-----
NPS5 mod2 LDFMTVHAEP MSQALVARWA ----DLVHMR PSYGPTECSV TSAVG--KR-
NPS6 mod1 LESIALGGEG VSISDAMSWG ----QRTRVV NAYGPSEATV GATIND-----
NPS8 mod1 LKRLLLGGEM IVPSDIALFA ----DNCIIT LVYGPSECTP MTMFHN-----
NPS8 mod2 ISVVNLSGEP VAPSDRSILS ----RKTQV NLYGPAETNV VTVQDL-----
NPS9 mod1 LH TLVLAGEP VQDDIMDRWA ----PKVDLI SIYGTSECSV CITGR-----
NPS9 mod2 LEVLCLTGEV ISTTLIETWA ----PCAHLV NAYGPSECCA ASS----KR-
NPS2 mod1 LKLLLTIGEM LTQPVIDEFG G DATKESILW AMYGPTEAAI HCTIWP-----
NPS2 mod2 VEFLVTAGEA VTEHVRKWA ----GR-GLY QGYGPSETTN ICTVRVA---
NPS2 mod3 VKWLYCIGEA MSSSVKWEW ----G--ACV NSYGPTEAA- FCTTITP---
NPS2 mod4 KGVFITGGES LKQEILDVWG ----PKGVIY NGYGPTEATI GCTMYPR---
NPS1 mod2 LDVLLVAGDR ADPGDMLAAQ S--LVKGVVA NAYGPTENSV MSTLYILT--
NPS3 mod2 LEMLCVGGEA LQSNDIVSIK T--LRTGKIV NGYGPTEENTT FSTIFVLS--
NPS3 mod4 LDTLLVAGDR ADINDLFTAR N--LVTNKVF NAYGPTENSV MSTLYLLS--
NPS7 mod1 LSRILCGGEA LSRRLADRL L---CAESVW NMYGPTEATV WASIWR-----
NPS11 mod1 IKYVVTGGER LG-RLADEWA ----ENACFY NICGPTEITI LNSAHR-----
NPS10 mod1 LKTVWLNGEV VT TDLARRGI K-ALPNARLL NVYSACETHE IACGDIKDML
```

|                   | 360        | 370        | 380          | 390        | 400            |
|-------------------|------------|------------|--------------|------------|----------------|
| <b>Consensus</b>  | -          | IG         | W            | -- ---     | L P G GEL EG   |
|                   |            |            |              |            | <b>A6</b>      |
|                   |            |            |              |            | <b>GELxIxx</b> |
| <b>NPS1 mod1</b>  | -NGAQQYKPG | IIGKPI-ASV | SWVVDPDD--   | ---CNKLVPL | GAIGELLVEG     |
| <b>NPS1 mod3</b>  | --KKEDYNSG | TIGKSV-AST | SWIVHPEN--   | ---HNMLVPL | GCVGELLVEG     |
| <b>NPS3 mod1</b>  | -NTGPDFQSG | MIGRSM-ASV | SWVTNPDN--   | ---HNQLVLF | GEVGELLVEG     |
| <b>NPS3 mod3</b>  | --DMKGLDPE | PIGNSV-ASV | SWVVNPDD--   | ---HNRLAPL | GAVGELLVEG     |
| <b>NPS4 mod1</b>  | -FSDGRGEAT | NIGKAV-GCV | TWVVDPEN--   | ---RNRLMPI | GCKGELLLEG     |
| <b>NPS4 mod2</b>  | -HTR-PNNLG | DVVTA----R | GWIVLRNN--   | ---HNILAPV | GAVGELLLEG     |
| <b>NPS4 mod3</b>  | DHKLIASEPG | TIGTGS-GCR | LWIVHPRN--   | ---HDKLMPV | GTVGELVIEG     |
| <b>NPS4 mod4</b>  | -EQRSLSNIG | NVLKAG---R | GWLTNPNN--   | ---PHQLAPV | GATAELCLEG     |
| <b>NPS5 mod1</b>  | EDVSYNMDPT | NIGRALPGCA | SWIVRIDT--   | ---PHALAPI | GVVGELLVEG     |
| <b>NPS5 mod2</b>  | --MTARSDAA | NIGWPV-GCR | GWVVDPGC--   | ---LDTLVPV | GAIGELVLEG     |
| <b>NPS6 mod1</b>  | --NVAAKPYI | TMGKRK-GCA | LWLSDPEN--   | ---HNKLVPL | GAVGELLIEG     |
| <b>NPS8 mod1</b>  | --PENS-VDI | ALGHGM-GTK | TWVVNPDN--   | ---VHQLCPI | GTIGELCLEG     |
| <b>NPS8 mod2</b>  | --DELTTQEV | SIGKGY-GAS | TWIVDLKN--   | ---SDILAPI | GEIGELWIEG     |
| <b>NPS9 mod1</b>  | -MVHGQTPRN | CIGRAT-GSL | SWIVDPMD--   | ---HNRLLPV | GAVGELVIEG     |
| <b>NPS9 mod2</b>  | -DVIIGSNLR | NIGTAI-GTA | CWVIDYEN--   | ---HHQLSPV | GCVGELLVED     |
| <b>NPS2 mod1</b>  | -QFSTSDSTN | TIGHPLDTS  | AFILASSTGL   | HTSPIDILPI | GQAGELAIGG     |
| <b>NPS2 mod2</b>  | --VTPDDLIN | NIGSPFANTS | AFVLDPEPES-- | ----QDILPR | GAVGELCFGG     |
| <b>NPS2 mod3</b>  | --LSKDESTS | IIGKPFPTTS | FAVFSEGS--   | ----QTPLPA | LSIGELYIGG     |
| <b>NPS2 mod4</b>  | --VPANGKPS | NIGPQFDNVG | SLVLRPGS--   | ----DVPVLR | GGVGEKCVSG     |
| <b>NPS1 mod2</b>  | -ENEKRVNGV | PIGRAISSSG | AYVMSKQ--    | -----QLVPL | GVIGELVVTG     |
| <b>NPS3 mod2</b>  | -KDDEYANGV | PIGRALSNSG | AYVMDLKQ--   | -----QLVPL | GVVGEKLVVTG    |
| <b>NPS3 mod4</b>  | -DNEACVNGV | PIGRSISNSG | AYVMDPEQ--   | -----NLVPL | GVVGEKLVVIG    |
| <b>NPS7 mod1</b>  | ---VLPGKNV | VIGKPITNYR | LYVLDDG---   | ----LEPVSF | GCAGELYIGG     |
| <b>NPS11 mod1</b> | ---HTPGQFL | SIGKPLPNTT | CYLLDADE--   | -----QPVPV | GQKGTMWVGG     |
| <b>NPS10 mod1</b> | EKIDKDAAYC | PVGPPLIDKK | YIYILDES--   | ----GQRVDD | GENGELCVGG     |



|                     | 410        | 420         | 430        | 440        | 450              |
|---------------------|------------|-------------|------------|------------|------------------|
| <b>A6 continued</b> |            |             |            |            | <b>A7</b>        |
| <b>xGLARGYL</b>     |            |             |            |            | <b>RxYKTGDLx</b> |
| <b>Consensus</b>    | ARGYL      | T F         | --         | ---        | -R Y TGDLV       |
| <b>NPS1 mod1</b>    | PIQARGYLND | VVKTEAAFIN  | NPSWL--LNG | TKTSAGRQG- | -RLYKTGDLV       |
| <b>NPS1 mod3</b>    | PILARGYLED | EEMTNSVFNH  | DPIWL--LEG | CKNYPGRPG- | -KLYKTGDLV       |
| <b>NPS3 mod1</b>    | PILARGYLND | TMKTEAAAFVS | NPSWL--MQG | SDDRTGRQG- | -RLYKTGDLV       |
| <b>NPS3 mod3</b>    | PNLARGYLND | AKKTETAFIN  | EPPWL--LRG | SEGYSGRRG- | -RLYKTGDLV       |
| <b>NPS4 mod1</b>    | PILSRGYLND | MEKTQAAFIT  | DPEWAR-VTG | P---TGR--- | -RFYCTGDLI       |
| <b>NPS4 mod2</b>    | GAVGAGYLNN | PEKTAEAFVK  | EVHWPkdLLG | A---NDNTPP | -RIYKTGDLV       |
| <b>NPS4 mod3</b>    | PTVARGYLNE | EKTRKAFIT   | NPLWTTTIAA | Q---HGKFET | VRMYKTGDLV       |
| <b>NPS4 mod4</b>    | SNLGREYLND | PKRTAEAFVE  | NPHFLKDFTR | S---VAN--- | -RIYRTGDLV       |
| <b>NPS5 mod1</b>    | PILARGYLIE | PEKTISSFVT  | GLEWAP---- | ----Q-K--- | -RLYRTKDLV       |
| <b>NPS5 mod2</b>    | PIVGRGYLRD | QQKTAAAFVT  | FSPAGQ---- | ----KPR--- | -RVYCTGDLV       |
| <b>NPS6 mod1</b>    | PIVGNGLYLN | PSKTKEVFIE  | -DPEF-LLKG | SKSYPGRHG- | -RIYKTGDLV       |
| <b>NPS8 mod1</b>    | PLLGAGYLED | KLKTEQA---  | -----FIRD  | LSWHRDPQA- | -QIYRTGDLV       |
| <b>NPS8 mod2</b>    | PLSGLGYLAE | TTEFQKASWV  | KNPIW-LTRG | TERFPGRHG- | -QLYRTGDLV       |
| <b>NPS9 mod1</b>    | PSLAQGYLGE | PDRTQFAFIE  | DPSWVH-LVG | PKSLQRR--- | -RFYKTGDLA       |
| <b>NPS9 mod2</b>    | HTLARHYLNX | MEKTAETFVP  | RPTWLP---- | ----WGSCG- | -RLYKTKDLV       |
| <b>NPS2 mod1</b>    | PQVAKEYLHR | PDLTRASFVE  | HPYYG----- | -----      | -RLYRTGDRA       |
| <b>NPS2 mod2</b>    | SQVFRGYLNR | PELNAQKIIQ  | HP-----    | ----TYG--- | -RIYRSGDMG       |
| <b>NPS2 mod3</b>    | AQLARGYWGR | ANLTNDRFVS  | R-----     | ----CGQ--- | -RFYKSGDMV       |
| <b>NPS2 mod4</b>    | KLVGKGYLNR | PDLTTERFPY  | LNR-----   | ----FSQ--- | -RVYRTGDVV       |
| <b>NPS1 mod2</b>    | DGLARGYTDS | RQDIDRFIVV  | TIS-----GT | T-----     | IRAYRTGDYV       |
| <b>NPS3 mod2</b>    | DGLARGYTDP | KRNIDRFVTV  | EID-----GE | N-----     | MKAYRTGDYV       |
| <b>NPS3 mod4</b>    | DGVARGYTDP | NRNVDRFVTI  | TVG-----NQ | T-----     | MRAYRTGDYV       |
| <b>NPS7 mod1</b>    | VSLANGYHNM | PEVTQSRFVQ  | NPFHS----- | -----G---  | -LIYRTGDIA       |
| <b>NPS11 mod1</b>   | AGVTRGYINL | PELTARRYKH  | D-----     | -----K---  | ---FVNDGYV       |
| <b>NPS10 mod1</b>   | HLLARGYLNL | PETTEKAFIR  | NP-----    | ----YSSKIG | ARMYRTGDKA       |

**A7 continued A8**

|                   | <b>R</b>   | <b>GRxD</b> | <b>xQ</b>  | <b>VKIRGXRIEL</b> | <b>GEIE</b> |         |       |
|-------------------|------------|-------------|------------|-------------------|-------------|---------|-------|
| <b>Consensus</b>  | Y          | D-G         | GR D-      | Q                 | VK RGQR EL  | GEIE L  | ----- |
| <b>NPS1 mod1</b>  | YYN-TD-GNL | MYIGRKD-SQ  | VKVRGQRVEL | SEIEYHLHEC        | MPE         | -----   |       |
| <b>NPS1 mod3</b>  | HYNNSD-GTL | TYIGRKD-NQ  | VKIRGQRIEL | GEIEHCLYEC        | IPG         | -----   |       |
| <b>NPS3 mod1</b>  | YYN-AD-GNL | VYVGRKD-SQ  | VKVRGQRVEL | GEIEHHLHQC        | MPG         | -----   |       |
| <b>NPS3 mod3</b>  | HYT-AD-GSL | VYVGRKD-NQ  | VKVRGQRIEL | AEIEHHLYQC        | LPD         | -----   |       |
| <b>NPS4 mod1</b>  | QYT-SE-GEM | MYLGRKD-SQ  | VKLHGQRIEL | GEIEHHL-KL        | NLA         | -----   |       |
| <b>NPS4 mod2</b>  | KYN-ED-GTM | LYLGRKD-FQ  | AKVRGQRLEL | SEVEHKLLD-        | --D         | -----   |       |
| <b>NPS4 mod3</b>  | RYN-SD-GSV | SYVGRKD-TQ  | IKLNGQRVEL | GEIEYHVGQN        | LPE         | -----   |       |
| <b>NPS4 mod4</b>  | SYD-LD-GSI | KYMGRKD-NQ  | IKVAGQRMEL | GEVEHNLQR-        | --D         | -----   |       |
| <b>NPS5 mod1</b>  | YYD-SE-GDL | HFVGRVD-AQ  | VKVHGQRIEP | GEIERNLAL         | G           | -----   |       |
| <b>NPS5 mod2</b>  | RYA-TD-GSL | IILGRRDDSQ  | VKVRGQRVEL | AEIQHHLDLV        | P           | -----   |       |
| <b>NPS6 mod1</b>  | RFDPDGDGEP | IFVGRQD-QQ  | VKLRGQRIEL | AEIEFNMQKH        | LPP         | -----   |       |
| <b>NPS8 mod1</b>  | KYIGDDLGLT | VYVRRKD-TQ  | VKLRGQRVEL | GEIEQHVHQA        | IMFGTPDHLE  |         |       |
| <b>NPS8 mod2</b>  | RYTKD--GSL | IYCGRAD-RQ  | VKINGQRVEL | GEIDVALQAL        | VKR         | -----LG |       |
| <b>NPS9 mod1</b>  | RYY-DD-GTV | HLVGRAD-MQ  | VKVRGQRVEL | AEIESHLCQM        | SPS         | -----   |       |
| <b>NPS9 mod2</b>  | RYV-PD-GSM | WLLGRKG-YS  | VKFHGQRVEL | GEIEYNxxxx        | xxx         | -----   |       |
| <b>NPS2 mod1</b>  | RINEQ--GLL | ECLGRVVAGQ  | VKLRGQRIEL | GEIEQAIMKT        | R           | -----   |       |
| <b>NPS2 mod2</b>  | ILLPD--DSI | LSTGRTD-DQ  | VKIRGQRVEL | GEVTSVILDH        | GAV         | -----   |       |
| <b>NPS2 mod3</b>  | RMLSD--GNF | EFMGRLD-DQ  | VKIRGLRVEL | GEINSILAE         | DPD         | -----   |       |
| <b>NPS2 mod4</b>  | RILHD--GTF | HFLGRAD-DQ  | VKLRGQRLEV | AEINSVIKQS        | DSD         | -----   |       |
| <b>NPS1 mod2</b>  | RQRPMG-QQL | EFFGRMD-GQ  | VKIRGHRIEL | GEIESVLCS-        |             | -----   |       |
| <b>NPS3 mod2</b>  | RYRPTD-GQL | EYFGRMD-GQ  | VKIRGHRIEL | GEIEHVLRS-        |             | -----   |       |
| <b>NPS3 mod4</b>  | RQRPTD-GEM | EFFGRID-GQ  | VKIRGNRVEL | GEIESVLRG-        |             | -----   |       |
| <b>NPS7 mod1</b>  | KFDGPD--RL | IVLGRAD-GQ  | VKIRGHRIEL | GDIEAAITD-        |             | -----   |       |
| <b>NPS11 mod1</b> | RNIIGIMLDL | HSAGQECSTP  | VTSHDGGRMV | HLICSAVKMS        |             | -----   |       |
| <b>NPS10 mod1</b> | RILPS--GLL | EITGRVG-AM  | IKIRGYSVVP | GKVENAILS-        |             | -----   |       |

|                   | 510          | 520          | 530          | 540        | 550          |
|-------------------|--------------|--------------|--------------|------------|--------------|
| <b>Consensus</b>  | -            | -            | -            | -----      | --           |
| <b>NPS1 mod1</b>  | -VK-QMAVEV   | ISPAGDTDKA   | -MVAVFLELD   | -----      | --EETCGTYH   |
| <b>NPS1 mod3</b>  | -VK-QLAVEA   | IQPSGQGSQP   | -LLAAFLHLQ   | -----      | --SNTQHAEL   |
| <b>NPS3 mod1</b>  | -VK-QLAAEV   | ILPTGDQGKA   | -MVA AFLQLS  | -----      | --EETHHT-P   |
| <b>NPS3 mod3</b>  | -IK-EIAVEV   | ILPTG--GKP   | -IVAAFLEAN   | -----      | --SELLNS--   |
| <b>NPS4 mod1</b>  | -TSAKSAVEL   | VKFND---TN   | -ATKALVAFL   | -----      | --CLSEQEEM   |
| <b>NPS4 mod2</b>  | -HM-VQSALA   | SVPTKGPCAK   | -RLVAILSLQ   | N-----     | -MPSTTLGTA   |
| <b>NPS4 mod3</b>  | -NV-QSAVEL   | ITPSTRSSAK   | -ALAVFFAVV   | HPSLVEGEQD | AQHATADDAG   |
| <b>NPS4 mod4</b>  | -DS-IRQLVV   | QLPKTGPCAK   | -KLTAVISFS   | -----      | -TSMTAYANT   |
| <b>NPS5 mod1</b>  | -SL-LHS-IV   | LVPNAGPCAG   | -ILVAVIAHQ   | -----      | -RQSTQDVYD   |
| <b>NPS5 mod2</b>  | -DF-ANS-LV   | LLPSKGPLQG   | -KLTVVASLK   | DDIDP----- | CPSSLQLIHS   |
| <b>NPS6 mod1</b>  | --DTQLAAEV   | IKPSGGGEQT   | -LVAFLEVEQK  | K-----     | ----NGMRHL   |
| <b>NPS8 mod1</b>  | QP NLNIVA EV | VHAEETENAV   | -LVTFVSLRT   | N-----     | ----ANQSEA   |
| <b>NPS8 mod2</b>  | -HDWHVAVET   | VQSLESDVQV   | -IMAFVAPRN   | -----      | ----VCIDEK   |
| <b>NPS9 mod1</b>  | -ISLKFAVSL   | IFPRG---TP   | -MLAAFIARQ   | -----      | --SGFGPEFP   |
| <b>NPS9 mod2</b>  | -xxxxxxxxxx  | xxxxxxxxxxxx | xxxxxxxxxxxx | -----      | --xxxxxxxxxx |
| <b>NPS2 mod1</b>  | --GCRAVTAM   | VIQDN-----   | -LVAFCSGRD   | -----      | -----        |
| <b>NPS2 mod2</b>  | -WDCVT---L   | ALEQSTNSKT   | -LVSFVWPRE   | -----      | ----DSSSR--  |
| <b>NPS2 mod3</b>  | -LLSVTT-QI   | LLKGESSKEQ   | -LVSFVWLR-   | -----      | -----        |
| <b>NPS2 mod4</b>  | -ISDVAT-LV   | LKHPKQKQEQ   | -LVSFVWCG-   | -----      | ----KALK--   |
| <b>NPS1 mod2</b>  | -HRCVRDAAV   | VLAQKDQSDH   | -AIFGYVTLK   | -----      | -----QEAT    |
| <b>NPS3 mod2</b>  | -HKS VSEAVA  | VVQQQNVDEA   | TRLAAFVTVF   | -----      | -----EGDV    |
| <b>NPS3 mod4</b>  | -HNFVRDAVV   | VAEQQQEKDQ   | -RLFGYVTLK   | -----      | -----EGSE    |
| <b>NPS7 mod1</b>  | -HSDVLDVV    | ISRDDR-----  | -LIAYCINVD   | -----      | -----        |
| <b>NPS11 mod1</b> | -FQNVRRGAA   | MLVEN-----   | -ALCAFYATE   | G-----     | -----        |
| <b>NPS10 mod1</b> | --HLAVSHCA   | VIAFGDGIDR   | QLVAYIVRDK   | -----      | -----        |

|                   | 560         | 570         | 580            | 590         | 600         |
|-------------------|-------------|-------------|----------------|-------------|-------------|
|                   |             |             | <b>A9</b>      |             | <b>A10</b>  |
|                   |             |             | <b>LPxYMVP</b> |             | <b>S</b>    |
| <b>Consensus</b>  | ---         |             | L L P Y M P    |             | P           |
| <b>NPS1 mod1</b>  | VSESEFGSNPA | ---MRLARMD  | DTDIELVQRL     | PSHMVPEVYF  | AIAKLPMTTS  |
| <b>NPS1 mod3</b>  | IGNTTRNDST  | ---AQFVLPD  | GVDKRLTERL     | PEYMVPTVFF  | SVAQMPMTAS  |
| <b>NPS3 mod1</b>  | ISQISDSNSE  | ---VQVIFPT  | QVDEQLAQRL     | PRDMVPEVYF  | AVTEFPLTTS  |
| <b>NPS3 mod3</b>  | K--KSDSGSG  | ---VHVVFPA  | QAEDELSQRL     | PRDMVPGIYF  | ALVEFPIMTS  |
| <b>NPS4 mod1</b>  | VAIGEMTES-  | ----LRAVAK  | RVEMALANAL     | PVYYVPSVFM  | PVTRMPMTTS  |
| <b>NPS4 mod2</b>  | SPLQILSQDF  | ---ASPNVAS  | IRDS-LCERL     | PTYMIPSLWV  | AINRFPMLPS  |
| <b>NPS4 mod3</b>  | SDDLPLPLDD  | ---QLRDICK  | NAENGLAGSL     | PTYMIPSIFI  | PVKKMPWTTSA |
| <b>NPS4 mod4</b>  | QWNTPLSDPE  | ---SLSLLNR  | SRER-LMERV     | PPYMPVPIVWI | AVPRIPSLVS  |
| <b>NPS5 mod1</b>  | MATFERPETS  | ---YISNLRN  | FLLD--L--V     | PHYMIPAIWL  | VVRDMPHNTS  |
| <b>NPS5 mod2</b>  | SPGWTSTRAT  | ---YASHVLT  | VVQKALSCKL     | PTYMVPHTWL  | LVGKLPQIS   |
| <b>NPS6 mod1</b>  | DGNVFGSFTN  | ---KFQDALR  | DMTKQLFVDL     | PSYMIPSAYI  | PLWKMPLLVS  |
| <b>NPS8 mod1</b>  | D-----HQK   | ---TIRQLTV  | GISDRLEQVL     | PSYMVPTSYI  | PLSSIPTTIT  |
| <b>NPS8 mod2</b>  | Q-----LEN   | ---HIMQEAS  | LLREQLRSVL     | PQYMPRAFV   | PLAALPLTAT  |
| <b>NPS9 mod1</b>  | YDFSHKPEPA  | SKAELLELAM  | QLSKRLAMML     | PSYMIPAVFL  | PLAYMPLTAS  |
| <b>NPS9 mod2</b>  | xxxxxxxPLGF | ---DVSVISR  | YALQ--R--L     | PVHMASTIWI  | VIEKILTLPS  |
| <b>NPS2 mod1</b>  | -----       | -----GMSRG  | AVLTTCKHWL     | PASMIPSDVF  | VIDVMPQLPS  |
| <b>NPS2 mod2</b>  | -----VESL   | EPSKFTTTIS  | ELFDLLSRRV     | PSYMPVSHLI  | PISCLPMTQP  |
| <b>NPS2 mod3</b>  | -----QSI    | QESDIPTLQR  | KLKKLASARL     | PSYMPVQFFL  | VVDEIPKSMA  |
| <b>NPS2 mod4</b>  | -----AQPE   | VLLGEVGGIA  | SAKQACNDKL     | PPYMLPTHFV  | PLTSMPLNVN  |
| <b>NPS1 mod2</b>  | MTEDPIEDSR  | QLQHVNAAWEE | RFDSETYALI     | DGIKPETVGR  | DFVGWTSMYD  |
| <b>NPS3 mod2</b>  | VADEEPNDND  | ESQHVDTWED  | QFDSKVYMPI     | SNVLSEAVGR  | DFIGWTSMYD  |
| <b>NPS3 mod4</b>  | MPAGKNSDSN  | QIQHVTAWED  | RFNTEIYAPI     | SHIESGTIGQ  | DFIGWTSMYD  |
| <b>NPS7 mod1</b>  | ---GDSSDET  | --EEKPALES  | LLRPWLAQLL     | PAYMMPAFFV  | SLKSFPMTPN  |
| <b>NPS11 mod1</b> | -----       | -----SVDEE  | ALKSFTQKHL     | PYYSVPEKWV  | KVDSIPLTNN  |
| <b>NPS10 mod1</b> | --NTSAERPE  | LEIDRTGRSS  | TARRMLMTYL     | AHYMIPSLWV  | EMDKLPTSDV  |

**A10 continued**

**GK xDR**

|            |            |
|------------|------------|
| Consensus  | K- DR L    |
| NPS1 mod1  | TK-VNRRQL  |
| NPS1 mod3  | RK-TDRRRL  |
| NPS3 mod1  | AK-VDRQRL  |
| NPS3 mod3  | GK-IDRKRL  |
| NPS4 mod1  | GK-LDRKVL  |
| NPS4 mod2  | GK-LDRRRA  |
| NPS4 mod3  | GK-LDRNRL  |
| NPS4 mod4  | TK-FDKKQV  |
| NPS5 mod1  | GK-LDRKRM  |
| NPS5 mod2  | CK-IDRKLIV |
| NPS6 mod1  | CK-TDRKRL  |
| NPS8 mod1  | GK-TDRVRL  |
| NPS8 mod2  | GK-VNLRKL  |
| NPS9 mod1  | GK-MDRRKL  |
| NPS9 mod2  | SK-INLRLV  |
| NPS2 mod1  | GK-VDRKSL  |
| NPS2 mod2  | AK-IDKRFL  |
| NPS2 mod3  | GK-IDKKAL  |
| NPS2 mod4  | NK-ADGKAL  |
| NPS1 mod2  | GSDIDKAEM  |
| NPS3 mod2  | GSAIDKVEM  |
| NPS3 mod4  | GSDIDKTEM  |
| NPS7 mod1  | NK-IDRKAL  |
| NPS11 mod1 | GK-VDRKVL  |
| NPS10 mod1 | SGKVNLKAL  |

Supplementary Figure 2

|                      | 10          | 20              | 30          | 40          | 50          |
|----------------------|-------------|-----------------|-------------|-------------|-------------|
| <b>E1 homolog</b>    |             |                 |             |             |             |
| <b>PxxPx Q</b>       |             |                 |             |             |             |
| <b>CON Consensus</b> | P P Q       |                 | - Y         | -- -- --    |             |
| NPS1 con2            | IEDVYPC SPL | QEGMLSLT-L      | KHAG-DYTMQ  | CVLELRAD--  | --AN--EDAF  |
| NPS3 con2            | VEDIYPC SPL | QEGLMSLT-V      | KRPG-DYIMQ  | TVLELRPD--  | --VE--EAAF  |
| NPS4 con3            | IEDIYPC SKL | QEGLIMLT-N      | KDPG-TYVVQ  | PVYRLPSD--  | --ID--LPRF  |
| NPS4 con6            | VQDVYPT SPL | QDALITLT-I      | KQPG-AYVAQ  | HVLALPQS--  | --VD--IAKF  |
| NPS6 con1            | VEDVYPC TPL | QEGLIALS-A      | KFQD-AYVAQ  | RVATLP AE-- | --T---AVRL  |
| NPS8 con1            | IVDMLPCT PL | QRNLA SWARL     | HPKG-HFR TT | HQLELKQH--  | --TD--IPKF  |
| NPS9 con1            | LDDAYPCT PL | QEGLMALS-A      | KLSG-SYVAR  | HTLNL PAT-- | --IS--TQQF  |
| NPS1 con3            | VSDILP ATHM | QHVVISR G-I     | RSRP-LAFNY  | LFLDMGYE--  | --VD--IPRL  |
| NPS3 con4            | IVDILPTT WM | QNLFISR G-V     | NDLA-LAFNY  | FFLDLGTR--  | --LD--VARL  |
| NPS4 con9            | ISDIFPV TDF | QALAITGS-I      | MESK-WMLNY  | FYLDGRGP--  | --VD--LRKL  |
| NPS4 con2            | VEDIYPC SSM | QEGLLSQ-T       | KDVG-YYAAA  | TLHEVLAP-Q  | FHMS--WKT V |
| NPS4 con5            | VEDIYPAS PM | QQGLLFTQ-S      | RNP D-LYTYQ | TICQVKSTDN  | NPVD--PRRL  |
| NPS4 con8            | VENIYPC SPI | QDGMILSQ-I      | RAPE-SYWSS  | TVFEVKAR-R  | GPVD--AKKI  |
| NPS5 con1            | IDDVYPC SPM | QEAMFIGQKT      | RTTQ-LYRTI  | GLFKVRTA--  | T--I--PQAV  |
| NPS5 con3            | IEAAYPC SPM | QESLLFSQ-L      | KNTN-PYNQH  | FLFQLMPGYD  | DPLEGRQERL  |
| NPS5 con4            | IVNILPC SPF | QEYTHQALQT      | DPTT-PYLYH  | TLVEITSDVG  | --LN--ATAA  |
| NPS5 con8            | IIDAYPAS PL | QEGISLSAYQ      | GLS--TYDTF  | WIWKCLPR-N  | GEEKVDMAQL  |
| NPS2 con1            | VALILPCT PL | QEAMLAETRS      | KPT--AYCNW  | IEVELSVAYT  | -----YEQI   |
| NPS2 con2            | ATKILPCT PL | QEAMISSG-L      | SSPGQAYCNV  | MVFDVKGD--  | --LQ----QL  |
| NPS2 con3            | VAAVRPCT PL | QNGMVSQFLA      | KEG-AVYMNY  | LRLQLEPK--  | --VD--LEKL  |
| NPS2 con4            | -ESLAPCT PL | QQGMIARSME      | NGNG-LYFNT  | FRFRLNMD--  | --VD--EGKL  |
| NPS2 con5            | VETVLPAT PL | QDGMVAEMVH      | SDFQ-LYFNH  | NIMEIEPH--  | --VG--LGKL  |
| NPS2 con6            | IEAVLPATAM  | QVHMLSVWQN      | TQGD-VFHAT  | FTYRLTGN--  | --IS--KSSL  |
| NPS1 con1            | YSGPVAQSFA  | QNRLWFLEAL      | HPGLHWYLV P | IALRINGP--  | --LQ--LDAL  |
| NPS3 con1            | HRGPVTQSFA  | QGRLWFLEQL      | HPGLDWYLMH  | LAVRIRGP--  | --FQ--LQAL  |
| NPS3 con3            | SDGPVEQSFA  | QGRMWLEEL       | HPGLTWYLM P | VVVRIRGP--  | --LQ--LSAL  |
| NPS4 epi1            | FDEEFDLSPI  | Q-SLYFQRP N     | TDG--HFNQS  | FYLRVARI--  | --TS--ATEF  |
| NPS4 epi4            | YSLPFGLSPI  | Q-KIFFESV G     | DSYN-HFNQA  | ETLRLSRN--  | --VE--ESEL  |
| NPS4 epi7            | LDEL FQLGPI | Q-RFYFQSQ G     | AEPNTHFNQS  | STLRITSH--  | --VE--LPVV  |
| NPS5 epi2            | IGVAWPLSPI  | QQMHFQASAK      | GDP--LDQQV  | MVLSITKH--  | -ISD---DLL  |
| NPS8 epi1            | EVLNLPLRKV  | STTKRFTSLG      | GDS---ITAM  | QVVSQCRK--  | --QG----VA  |
| <b>EPI Consensus</b> | F LSPI      | Q- F S G        | D --HFNQ    | LR R --     | -- --       |
|                      |             | <b>PI Q xWF</b> |             |             |             |
|                      |             | <b>E1</b>       |             |             |             |

60 70 80 90 100

C2

X xxxLRTxF

| Consensus | AW         | V            | LRT        | F    | ----        | Q          | VL         | -          |
|-----------|------------|--------------|------------|------|-------------|------------|------------|------------|
| NPS1 con2 | RAAWEEVTQS | LLVLRTRILQ   | HSTL       | ---- | GL          | LQAVLAE    | ----       | -----K--P  |
| NPS3 con2 | QIAWEKTVQS | LQILRTRIVV   | HKTL       | ---- | GL          | LQAVVAD    | ----       | -----K--M  |
| NPS4 con3 | KAAWKAVVAA | ESVLRTRIVY   | SEKY       | ---- | GF          | FQVVLREE   | --         | -----L     |
| NPS4 con6 | RSAWEKAIGD | IDILRTRIIQ   | LASG       | ---- | AF          | MQVVLRED   | --         | -----R--I  |
| NPS6 con1 | KEAFDTAVQG | SPILRTRIIN   | VSGR       | ---- | GL          | FQVVLKDG   | --         | -----Q--L  |
| NPS8 con1 | KQCWDMVVER | NPITRTHIVN   | LPKL       | ---- | GY          | TQVIVDRP   | --         | -----S     |
| NPS9 con1 | QDAWQRVVDS | HAALRTRIAE   | VEGF       | ---- | GM          | IQAVLSG    | ----       | -----P--I  |
| NPS1 con3 | KDACSTLVQH | FSMLRTRKFVY  | LEG        | ---- | NL          | WQVVLRSPLG | -          | RFSEFE--L  |
| NPS3 con4 | RRSIPALVKH | FSILRTRKFVY  | VDG        | ---- | VL          | WQTVLRDPEV | -          | PFIKFE--L  |
| NPS4 con9 | KQAAYRMVQA | FDILRTVFVP   | YGD        | ---- | RF          | LQVVLRLKLP | -          | EFMFEQ--T  |
| NPS4 con2 | AEAWQQVVKR | HPALRTVFVAE  | NVGVKG     | --LY | NQIVLKNIEV  | -          | NIVHLEAAD  |            |
| NPS4 con5 | AEAWQVVVHR | HQALRTIFID   | GLAKNG     | --SK | DQIVVKNKAG  | -          | RVQLFVDCD  |            |
| NPS4 con8 | VDGWRQVVAR | HPALRTVFID   | SVCKGG     | --VF | DQIVLKNPDS  | -          | GVVTCT-CS  |            |
| NPS5 con1 | ERCWQQVVNR | HQTLRTIYVP   | AAGGTG     | -RL  | DAVVLARNVQA | -          | SVSHKRCRD  |            |
| NPS5 con3 | SKAWARVVEK | HAILRTVFVAE  | SSSH       | ---- | GF          | MQIVLRKATP | -          | MVEWIRSKS  |
| NPS5 con4 | ARAWRAVVD  | HSILRTVFVP   | AKNGD      | ---- | KI          | YQVVLHDSS  | -          | VDCSITSVDK |
| NPS5 con8 | AEAWRSVVRK | HSILCTVMVP   | DPSGE      | ---- | GL          | IQLVLSEPE  | -          | ----IKVICL |
| NPS2 con1 | QDALLFLAQE | NEILRTGFCI   | DSQHTT     | --VF | SQVIWKELS   | -          | -----LS    |            |
| NPS2 con2 | QRCWKTVIQR | HEIFRTSFVA   | TDNP       | -L   | YSF         | AQVIVEGYG  | -          | -----MGWH  |
| NPS2 con3 | KAAWSSTMER | HSLLRTRGFVAH | VNDPLFPFAM | -    | IEYTQVSVT   | -          | --LPWSAIRE |            |
| NPS2 con4 | RHAWETMYSN | TQILRTVFVN   | TEEG       | ---- | Y           | LQAVLGGIPF | -          | NG-FIQTSTQ |
| NPS2 con5 | KSAWQTVVAN | SPILRTSFFM   | VDDPTLDFAY | -    | LQVVHQQLP   | -          | ---AEAMTEL |            |
| NPS2 con6 | SGAWKSVAE  | FPILRTIFFT   | NDQPGK     | --PV | MQVILRP     | ----       | -----DALAD |            |
| NPS1 con1 | KAALRTIEHR | HETLRTTFST   | HNGT       | ---- | GV          | QLV--HQFSD | -          | EKDVTVIEVP |
| NPS3 con1 | QAALQTVERR | HETLRTTFST   | NNGE       | ---- | NL          | QEV--HPFHD | -          | GKDLNVIDIN |
| NPS3 con3 | ESALNAIENR | HETLRTTFST   | VGDA       | ---- | SM          | QVV--QPFHP | -          | RAMNVIDID  |
| NPS4 epi1 | HAAVRQLVTR | HSMLRARFSH   | SAER       | ---- | GW          | QQ---HDIEG | -          | SYRFRHSAVT |
| NPS4 epi4 | RTALVALVKI | HPMLRGRFTR   | NEIG       | ---- | IW          | KQRVEQDVEN | -          | SFRLQRHHVQ |
| NPS4 epi7 | KRALDAIVTC | HGMLRARYSK   | NTAG       | ---- | EW          | QQLV-KPVAN | -          | SYVFEAHAVS |
| NPS5 epi2 | HNAFRHIVEV | HPMLRARFTP   | TIDG       | ---- | W           | VQHITDDVSG | -          | --SFALRFHH |
| NPS8 epi1 | LTALRAIIDR | HSMLRARYHR   | SSQG       | ---- | LW          | SQHIAPLGP  | -          | ----WNMIEH |
| Consensus | ALRAIV     | H MLRARF     | G          | ---- | W           | Q          | DV         | S F V      |

x HxxLRxR

C2 homolog

110

120

130

140

150

C3  
xH

Consensus

```

NPS1 con2 EWVANNLAT YLDQSQSSPI ELGQPLVHFA LVRDQQ---T KKRWFVWTIH
NPS3 con2 KWAEADDLAT YLAQDKLLSM QLGEPLARYA LVRDSH---K EKRWFVWTIH
NPS4 con3 PWHLSAVQD IDESTRRLPA KNGAPLTTLT LVGEN----T TQPIFVWTVH
NPS4 con6 NWNEAGSLQD VQAEVLRIPS HHGGRLATYT IVTTE----S NQRYFVWTIH
NPS6 con1 VREYSTEVSE YLRLDRNEPM DLGTALFRYG LVEEPG---S DKMNFVITMH
NPS8 con1 KWIDGSTLEQ CHKELASRHT LQGEPLVNFA LARLASPTNQ QSAWFLCDLH
NPS9 con1 KWQKAEDLES YLTLDEQRPM WMGDPLARHA IIQSNNH--S ALYHYVLTIH
NPS1 con3 SKPLEKASDV ICTHDIAQ-S SPTELPTSFM FIKS--A--D GEHRLIIRLS
NPS3 con4 DMPLDEAADT VCLEDSRN-T EPLELATAFL LVKS--S--S GEHRLVIRIT
NPS4 con9 DDDLDTFTRG LQQRDREMGP RVGEAFIQFV VAKQK-Q--T GSHRIFMRLS
NPS4 con2 EDDAIRIIEE QRSISYS--- HGQCPNHRLT ICDTA----D GRIFCSLDIS
NPS4 con5 DRISAEMLRG LAPIDCR--- -ESTPPHRMT IAKTK----S GKVWMKLEIS
NPS4 con8 DAELSAMLQS IKHSSLNG-K KKPVLPHQAA VIQTT----S GRVIVKLIIN
NPS5 con1 KTEVQEKYIS RCNSDSP--- FMNGVLHQAF IWSTD----N GEIFCILDLS
NPS5 con3 KEAVVKTWEQ DLLMPGPLP- LSGKLLHSLK IYIVED---- GTIFCQLDKN
NPS5 con4 VSSIDETANL HMTDIRSKCL ASAVPPLALR LFLVD----S GRMFALLAIG
NPS5 con8 EIHGQDPEDV LYQLQRPLWT SQGSPRHCFE VYQSG----- VKTAFRLDIN
NPS2 con1 QIQKVASFSN QYSMQSDHDF LRPFGVQIKT HCKLP----- ---RLLFQIH
NPS2 con2 EDSIDSGQLL RVSKILFDLM EANKPPVYFS LNREE----- DSAKLLFCCH
NPS2 con3 QKKSQSSNAW LQRIRAQSLK ELYVPPWALR FVERN----- DQSFLDLAIF
NPS2 con4 DDDLISHMAQ LHKDWLSLND VDFRQPFQVH LVSAQ----- KQKQLIVHIF
NPS2 con5 EIEREEDLSK ITDYATARAR KAGGHASLLQ LVFATLG--- DRRFVVLZIA
NPS2 con6 NPAEDIDPKQ WSSLSRKGQG GLVQPLNSMG GQOTD----N GDWILNFTIH
NPS1 con1 SNDKHHLLDA LQEDQTTSTFC LQNEPGWRVR IYRLNEQ--- -EHVLSIVMH
NPS3 con1 SND-EALLEV LELEQKTPFN LRSEPGWRVS VYRIDGE--- -NHVLSIVMH
NPS3 con3 EHS---LTDA VHRDQTTTDF LRTEAGWRVS LYRISKE--- -DHILSIVMH
NPS4 epi1 SQAT---IDA SIEDTQQCLD HANGPLFAAE FFDYGT---- -QQFAFLTGH
NPS4 epi4 EMNDP-ALQR AFDNSQASLN ITSGPTFAID LFEIEDDF-- -SQVLTVAH
NPS4 epi7 AVSS---AIP IANTQKSLD ILRGPVFAAN LFDIKG---- -EQIIFMAAH
NPS5 epi2 ADCTHKDIVQ RIGSTKLSVD MVNGPLVGID IFGSGE---- -KRFVSVTIH
NPS8 epi1 AVSKPSEAFN MAKELQKQLN IVNGPVFLAV HFTVTN---- HRPLLLLSAH
Consensus A - I TQ SLD I NGP FAA F ---- - Q L AH

```

H  
E2



**C3 continued**

**HxxxDGxS**

|                  |             |             |                 |                             |
|------------------|-------------|-------------|-----------------|-----------------------------|
| <b>Consensus</b> | HA DG S     | Y G ----    | -----           | --                          |
| <b>NPS1 con2</b> | HALYDGWSVP  | RIVSAVRTIY  | DGG----VLR      | KQPG----- --FNSFIKYL        |
| <b>NPS3 con2</b> | HAIYDGWALA  | HILNAVQTAY  | NGA----ELE      | KQFG----- --FNNFIKYL        |
| <b>NPS4 con3</b> | HAIYDGWSWT  | NLFRKVEIHY  | HND----VQD      | IPATVP----- --YSRFVKYL      |
| <b>NPS4 con6</b> | HALYDGWSIY  | LVLQRVQIY   | MKG----VSN      | ILQT-P----- --YARFIQYL      |
| <b>NPS6 con1</b> | HAVYDGWSMP  | LVFDRVNRAF  | NGL----HTE      | RPSS----- --FKHFIKHL        |
| <b>NPS8 con1</b> | WAAYDGWSLR  | LLLSEAONLY  | HGR----HPH      | PLND----- --MRVLTNSL        |
| <b>NPS9 con1</b> | HAIYDGLSLP  | ILLQDLNEAL  | RGT----GIK      | PRPQ----- --FNSFIRYV        |
| <b>NPS1 con3</b> | HAQYDGVCLP  | KILDTLSCIY  | NRK----PLG      | PSYP----- --FSTFLAYA        |
| <b>NPS3 con4</b> | HAQYDGVCFP  | SFIKTLFAIY  | SGK----PVE      | ATHS----- --FSTYLAYT        |
| <b>NPS4 con9</b> | HAQYDGVCMS  | KILLALQDGY  | NGL----PVS      | SAPS----- --FGNFVRET        |
| <b>NPS4 con2</b> | HAIMDGHSMS  | LLVSELRTAC  | EGQ----LTL      | D--YTP----- --LSAYIAWL      |
| <b>NPS4 con5</b> | HVINDGTSVS  | NMLVDLARAY  | ERK----LSR      | ADIGPL----- --YSDYIDHV      |
| <b>NPS4 con8</b> | HSVIDGGSLA  | VIENDLQEAY  | EGR----LTG      | E--GPL----- --YSDYIKYL      |
| <b>NPS5 con1</b> | HMITDGSSWV  | LLIEDFSRAL  | RGI----QSL      | S-VAPG----- --YDRYVDYI      |
| <b>NPS5 con3</b> | HIISDGISSR  | IMIQDLLDAY  | GDR-----LE      | GLSAS----- --FSDYINHI       |
| <b>NPS5 con4</b> | HMIIDHVSLT  | HILSDWDRFC  | RGWNP-LSDL      | DVLPP----- --FRHYIHHL       |
| <b>NPS5 con8</b> | HALIDGGSLM  | PLIQDLRMAY  | NGF----HSI      | AAPP----- --FGEMIRYL        |
| <b>NPS2 con1</b> | HALYDGWSLD  | LLLRLDHLCL  | RGK----QDL      | KRPS----- --FREVVRYL        |
| <b>NPS2 con2</b> | HALYDGIAMS  | TLLAEVQELY  | HGR----QLL      | PPVS----- --YDVYLKRM        |
| <b>NPS2 con3</b> | HALFDAQSLQ  | NIFTDVTAIFY | KGLS----LP      | PVPS----- --LNEVVSHV        |
| <b>NPS2 con4</b> | HGLYDGNSIG  | LLLQGVWNSY  | ERRD---SMP      | DAPS----- --FHTALAHG        |
| <b>NPS2 con5</b> | HALYDGWSLS  | LLHQDVQAAY  | EGR-----YT      | PRPS----- --YEAYLEEI        |
| <b>NPS2 con6</b> | HALYDALSLP  | MVVDRFAALC  | AGASISGEAD      | ASES----- --LKVWKEYT        |
| <b>NPS1 con1</b> | HIVSDGWSLD  | VLKKELAVLY  | AAAVRGENLI      | SRLSPLPVQY RDFS AWQ RMP     |
| <b>NPS3 con1</b> | HIVSDGWSVD  | VLKKELSKLY  | AAALRGEDLD      | SCLPPLPIQY RDFS V W Q K L P |
| <b>NPS3 con3</b> | HIVSDGWSTD  | VTRELGIFY   | SALIQGRDPL      | SCVQPLPIQY RDFS V W Q R Q Q |
| <b>NPS4 epi1</b> | HLVVDLVTWR  | LLLEEELEEIL | KGG---QLLA      | PALP----- --FQKWAELQ        |
| <b>NPS4 epi4</b> | HLVIDIVSWG  | VLLEDLQALL  | NGVQ---PSP      | QSLP----- --YHAWLQQQ        |
| <b>NPS4 epi7</b> | HLVVDLVSWG  | MIIQDLEDLL  | GSTGSMPTLQ      | RGLS----- --FQAWCEKQ        |
| <b>NPS5 epi2</b> | HLVVDVAVSWR | VILEDLEGII  | ARG----APA      | RPEP----- VHFQAWGRAQ        |
| <b>NPS8 epi1</b> | HLVIDLVSWR  | VIWRDLEDFI  | RNK--CLLSA      | RGIS----- --FRRWCKEQ        |
| <b>Consensus</b> | HLVVDLVSWR  | VILEDLE L   | --- A R LP----- | --FQAW Q                    |

**HLxVDxVSW**

**E2 continued (C3 homolog)**

|                  | 210        | 220        | 230        | 240         | 250        |
|------------------|------------|------------|------------|-------------|------------|
| <b>Consensus</b> | --- -      | YW - L     | P L        | -- ---      |            |
| <b>NPS1 con2</b> | SKQ---D-QD | ATATYWKA-A | LGGCTATTPF | PPLVPGVQ--  | -----PPIAD |
| <b>NPS3 con2</b> | EQL---D-QD | GLASYWRA-T | LSDCEAN-VF | PPLQSRVQ--  | -----QPVAD |
| <b>NPS4 con3</b> | CSL---D-QK | ESDAFWMS-H | LDNVTAT-QF | PQLPSADY--  | -----HVETN |
| <b>NPS4 con6</b> | SNR---D-HS | VSKEYWRT-N | LDQIDAY-QF | PRSSQVSA--  | -----KDKPS |
| <b>NPS6 con1</b> | ISL---D-PA | DAQQYWKE-R | LEGTIPH-QF | PPLPQKGY--  | -----TTQAD |
| <b>NPS8 con1</b> | WSC---E-LA | KAESYWQNF  | SGLTHAALAF | PQQQQQQPLV  | CREDSTLLRP |
| <b>NPS9 con1</b> | LAS---N-RE | DAQQFWKS-E | LSSVGLA-TF | PVLPSKTY--  | -----SPLAN |
| <b>NPS1 con3</b> | QS----Q-RP | ASELYWRR-L | LQGSNMIKIT | SLLCPRVP--  | -----ESNDQ |
| <b>NPS3 con4</b> | RG----R-RS | ISSQYWRN-L | LQGSRITKVT | SLLGPSIR--  | -----RGNNP |
| <b>NPS4 con9</b> | AK----T-VS | GAHDHWRE-V | LRGSKMTEIV | NRFPGPNYQ-- | -----RSAGR |
| <b>NPS4 con2</b> | TRQ---P-EE | ASLDFWKS-Y | LNGSEIS-SF | PVLDDGQGQL  | L---EKKLVT |
| <b>NPS4 con5</b> | LSM---P-RD | ADLAYWKT-Y | LSGIEPC-FF | PTLNDGKP--  | L---AREPAS |
| <b>NPS4 con8</b> | REL---S-AD | DAIGYWKG-K | LRGVSPC-HF | PTATRDTs--  | K---PRQLKS |
| <b>NPS5 con1</b> | RLD---PNAD | AALDYWMQ-Y | LEEVEPC-KF | PVLGDGDIR-A | A---TEIGEL |
| <b>NPS5 con3</b> | NET---D-AG | EAEKYWSR-Y | LDSATRC-HF | PQLAPPVN-K  | G---SQAMPT |
| <b>NPS5 con4</b> | SSR---N-LA | YSTNFWEG-R | LRNLLPCQVS | DPNSCSVG--  | -----DSQSM |
| <b>NPS5 con8</b> | SQS---N-HQ | EKIDWWGN-Y | LHKTKPCEVL | SIFNQPIKGI  | S---HDNERF |
| <b>NPS2 con1</b> | DDDRRLNKTQ | NSTNYWKS-L | LGDIPT-TL  | PNYHGKLVH-  | -----NASIH |
| <b>NPS2 con2</b> | LEQ---N-LD | EADKYWSA-L | LEGFEPT-SF | PSLTGKRVRE  | YEAFTSSSRR |
| <b>NPS2 con3</b> | IQSYKQD-NS | SGKEFWVE-- | LGKTANPSRF | PNLAPLKCD-  | -----PKPPI |
| <b>NPS2 con4</b> | PLR----IPD | DAKSFWKDLI | LARTSS---L | PTLFDNSS--  | Q----DAVVI |
| <b>NPS2 con5</b> | LR----SGDD | RSTAFWSG-Y | LAGAKPT-FY | PQLSLEQS--  | -----SVIY  |
| <b>NPS2 con6</b> | RQQT--HPSA | EAKQFWTE-Y | LAGAKSAPVN | LNLNTWTP--  | -----SRRVS |
| <b>NPS1 con1</b> | EQM---QGYQ | KQLEYWVA-E | LQSSRPAEFL | CDKPRPMTLS  | G---KAGVHK |
| <b>NPS3 con1</b> | GQV---QEHQ | RQLDYWIN-Q | LDSSRPAEFL | YDKPRPATLS  | G---KAGTQK |
| <b>NPS3 con3</b> | AQI---DNDQ | SQLEYWSN-Q | LNTSRPAELL | CDKPRPTALS  | G---QAGKEK |
| <b>NPS4 epi1</b> | QEH---A-ES | LEISEILP-E | VDVPHMDFSY | WGIHQDNTY   | G---NASHAS |
| <b>NPS4 epi4</b> | FLQ---VKQE | NPRKVFPT-- | VEIAPAKFDY | WGMGRPNLN   | G---DLISED |
| <b>NPS4 epi7</b> | SVN---ALDT | LQQSSIQRQP | LVVQPANLSF | WGMSTRSNLY  | G---DVERDD |
| <b>NPS5 epi2</b> | VEQ---ARTR | LDPARVLPAG | LDIESANTYF | WKMEGQPVFF  | Q---DSASKK |
| <b>NPS8 epi1</b> | HRE---S-CN | LMPDVLPL-- | FAVPPYDTSF | WGCASKDQVR  | G---NAIDST |
| <b>Consensus</b> | ---A       | L LP-      | V PA SF    | WGM N       | G---D      |

260 270 280 290 300

C4  
xxxxA AWA

|           |                        |            |            |            |   |      |    |
|-----------|------------------------|------------|------------|------------|---|------|----|
| Consensus | - -                    | T          | A          | AWA        | L | --DV | FG |
| NPS1 con2 | AIVEY-QCP- ---SFPRMTS  | DATLSATIRA | AWAILISQYT | GLD--DVVFG |   |      |    |
| NPS3 con2 | ATAEY-QCP- ---PLPKRTS  | NTTISTLIRT | AWAIVASAYT | NSE--DVVFG |   |      |    |
| NPS4 con3 | GQLLH-RVQ- ---LKRNAEL  | DVTVPSMIRA | AWGLLLATYS | GSD--DVVWM |   |      |    |
| NPS4 con6 | GQTLHYQMK- ---LAPHKHV  | DVTPTNVIRA | AWAIIAAYT  | HSN--DVVFG |   |      |    |
| NPS6 con1 | SLLEH-YVT- ---VPTSAHS  | KLTLATIIRG | AWALVSSLYM | GHP--DIVFG |   |      |    |
| NPS8 con1 | GDDHDASVVL QDFGCQGTGS  | GFTASTLIRA | ALGIVLARHL | QTD--RVVFG |   |      |    |
| NPS9 con1 | ASFQY-RIS- ---LQRKTRS  | DFTTATLIKA | AWGLLLARYN | DSP--QAVFG |   |      |    |
| NPS1 con3 | SGINVVRII- ---NMPKLPK  | NLTTASVUSA | AWAMILSHIT | GEE--DVTYA |   |      |    |
| NPS3 con4 | IEIQTESII- ---SMPHVPT  | GFTLASIVSS | AWARVLSKIT | GEE--DVVYG |   |      |    |
| NPS4 con9 | SITLERRVD- ---SPSLKRF  | DITSATVAKA | AWASTLACIA | SKS--DIVFG |   |      |    |
| NPS4 con2 | IRMDLSSISL PDFQSFCNAN  | GITLSNVFHT | AWALTLSCYI | GSD--DVTFG |   |      |    |
| NPS4 con5 | VVVDIHHIN- -PVQEFCQON  | GVTLSNLLQL | TWALTLHYV  | GAF--DVSFG |   |      |    |
| NPS4 con8 | FDMRFSRFG- -ELHGLAEAS  | NVTFANLFLT | AWALVLSYR  | KSS--DVCYG |   |      |    |
| NPS5 con1 | FEVQFTEFD- -ELQRFCCKHN | ETTISAVLQT | AWALLLRNYT | GNS--DVCFG |   |      |    |
| NPS5 con3 | EKVELVLDNK RALELKCRNF  | GISNSSALQA | AWALVLKTYL | NSE--AVIFG |   |      |    |
| NPS5 con4 | GAVSFTIETA GATQTFCKTT  | GVTLSNLLQF | AWALVLHVYT | GQD--TVCFG |   |      |    |
| NPS5 con8 | RYVKIPQSAT VGVIGFCQRF  | GITRSVFLQV | VWAMVLSYLT | DAP--DVCFG |   |      |    |
| NPS2 con1 | RFFGQSSVSR HNFLFECAHHS | AINPQVYFQA | ATAFVLSLYT | GSS--DVVLG |   |      |    |
| NPS2 con2 | LSMSLDSVR- ----NSCQNS  | SVSLLSVVHA | AWAKLLHFYT | HES--DICFG |   |      |    |
| NPS2 con3 | VCTRRSAKSL IDLENGCRQA  | NTTMPAVGMA | SWLSLLSSYT | GES--SVTCG |   |      |    |
| NPS2 con4 | ARTMRAPAN- --FDLIRRQL  | NVTAQAVVQA | CWFSVLHRHV | KG--DVATG  |   |      |    |
| NPS2 con5 | QHETTSQSDF YKIKSFTKQQ  | AITLQTLGQA | CHAAVLATVI | RSL--DVMFG |   |      |    |
| NPS2 con6 | LVQRNAIADV SRIKKLCAA   | GVSIQALFFA | AYARFVSETI | EAKSRDVVFG |   |      |    |
| NPS1 con1 | IRIDGQVCS- -KLRRFCRTH  | EVTVPFVLLA | TFRAAHYRLT | GQE--DATIG |   |      |    |
| NPS3 con1 | LTISHRLYE- -RLQDFARER  | GVTLFVLLT  | VFRAAHYRLT | NQD--DATIG |   |      |    |
| NPS3 con3 | INIDGPLYN- -KLQFCKAH   | GVTQFMVLF  | AFRATHFRLT | GQN--DATIG |   |      |    |
| NPS4 epi1 | FELDNELSS- -AFLTTCHNA  | YKTEPVEVLL | ASLIQSWSLV | FTD--RPIPA |   |      |    |
| NPS4 epi4 | IGLSTRDT-- -MLLLGAQDA  | LATEIVDILV | AGLLESFRKT | FQD--RSPVA |   |      |    |
| NPS4 epi7 | FTITKEIT-- -AMATGHHHV  | YKTDLVDIFL | AAVIHSFSRV | FIN--RKVPT |   |      |    |
| NPS5 epi2 | LQLSKASS-- -QAFGACKCH  | GFDQVDLLSA | AVLLSFLDLF | GRP--SASLF |   |      |    |
| NPS8 epi1 | MILDRDSSQ- -LLMGHSNDT  | MRTEPLDIIL | GALAHSFGQS | FPE--HKMPT |   |      |    |
| Consensus | L S-- -                | TE VDI     | L A L SF   | F --R P    |   |      |    |

310

320

330

**C5****xGPxxxTxP xR**

|                  | GR          | -          | ----   | GP          | P      | R   |
|------------------|-------------|------------|--------|-------------|--------|-----|
| <b>Consensus</b> |             |            |        |             |        |     |
| <b>NPS1 con2</b> | ATVNGRNAP-  | ----       | VAGIED | IIGPTIATVP  | VRIRID |     |
| <b>NPS3 con2</b> | ATVTGRNAP-  | ----       | VAGIES | LVGPVIATVP  | VRIRLQ |     |
| <b>NPS4 con3</b> | ETNSGREAI-  | ----       | VPGIEA | IIGPTITTAP  | ARLQLN |     |
| <b>NPS4 con6</b> | ETLTGRDVA-  | ----       | VNGIMD | ACGPVLTTPV  | TRVKID |     |
| <b>NPS6 con1</b> | ETLTGRSAP-  | ----       | VPGIEQ | IEGPMITTVP  | IRVRLS |     |
| <b>NPS8 con1</b> | ATVTGRQGA-  | ----       | ATGLDR | MAGPAFVTLV  | ICMSVD |     |
| <b>NPS9 con1</b> | CAVSGRISA-  | ----       | VSGVED | IVGPVLTATVP | VKIELD |     |
| <b>NPS1 con3</b> | SIVAGRNSN-  | ----       | VPYISE | IVGPCVNVIP  | VRAQVL |     |
| <b>NPS3 con4</b> | YMIAGRANAN- | ----       | IPNITK | IVGPCLNIIP  | VRARVH |     |
| <b>NPS4 con9</b> | HVISGRNGS-  | ----       | VPNIEN | IIGPCLNMVP  | VRVTYR |     |
| <b>NPS4 con2</b> | YLTSARDSEE  | ----       | IEDVES | IVGPLINTLV  | CRVNF5 |     |
| <b>NPS4 con5</b> | LVASGRDIP-  | ----       | VPNIES | AVGCFITMLC  | GRLVFS |     |
| <b>NPS4 con8</b> | YLTSGRDVP-  | ----       | VQNVES | AVGAFLNMLV  | SRVEIN |     |
| <b>NPS5 con1</b> | YLSSGRSLP-  | ----       | IHGVEA | IVGPLINLLI  | CKATGL |     |
| <b>NPS5 con3</b> | FLASGRDIP-  | ----       | IPGIDK | IVGPMVNMLP  | VRVQVT |     |
| <b>NPS5 con4</b> | YLVSDRDID-  | ----       | TVDSDE | IVGPLLSLVV  | GQVTIS |     |
| <b>NPS5 con8</b> | YLTSGRDAP-  | ----       | IQDVDR | MIGPLANMLI  | SKIQLN |     |
| <b>NPS2 con1</b> | NVTSGRTIP-  | ----       | VAGIED | IIGPCIASLP  | FRIDFA |     |
| <b>NPS2 con2</b> | NIVSGRSFPG  | -----      | EHLER  | LVAPCFNTLP  | VRVDFD |     |
| <b>NPS2 con3</b> | VVLSGRSSD-  | -----      | ATAH   | ANFPCINTVP  | LAFTVA |     |
| <b>NPS2 con4</b> | IIVSGRSIE-  | ----       | FEGADR | VIGPMFNTIP  | YHHRAQ |     |
| <b>NPS2 con5</b> | AVLSGRAGS-  | -----      | EEAEQ  | LMFPTMNTVA  | VRSVLH |     |
| <b>NPS2 con6</b> | VYLANRSS--  | -----      | DLSE   | IPYPTLCLVP  | LRVRVQ |     |
| <b>NPS1 con1</b> | TPNANRDQ--  | -----      | WELKD  | MIGFFVNMQC  | IRIKVE |     |
| <b>NPS3 con1</b> | VPNANRNR--  | -----      | WEVGD  | LIGFFVNIQC  | LRIKIQ |     |
| <b>NPS3 con3</b> | TVNANRDR--  | -----      | WELKD  | MIGFFVNLQC  | LRTTIT |     |
| <b>NPS4 epi1</b> | IFNEGHGREP  | WDSS-      | IDITR  | TVGWFTALSP  | ILVTPS |     |
| <b>NPS4 epi4</b> | IHNEGHGRET  | FNSR-      | QDLSR  | TIGWFSTATP  | IYLPIS |     |
| <b>NPS4 epi7</b> | VFNEESHGRQV | WESSNIDLSR |        | TVGWFTTMYP  | VTVPIG |     |
| <b>NPS5 epi2</b> | VEGHGREPFY  | PG---      | LDLSR  | TVGWFTTLAP  | IAIDKT |     |
| <b>NPS8 epi1</b> | VFLEGHGREP  | LGIRRIDCRD |        | TVGWFTVIYP  | LPLPTK |     |
| <b>Consensus</b> | VFNEGHGRE   | S          | -IDLSR | TVGWFTT     | P      | I P |

**TVGWFTTMxP****C5 homolog**

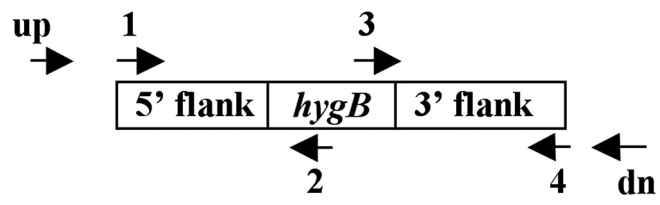

Supplementary Figure 3

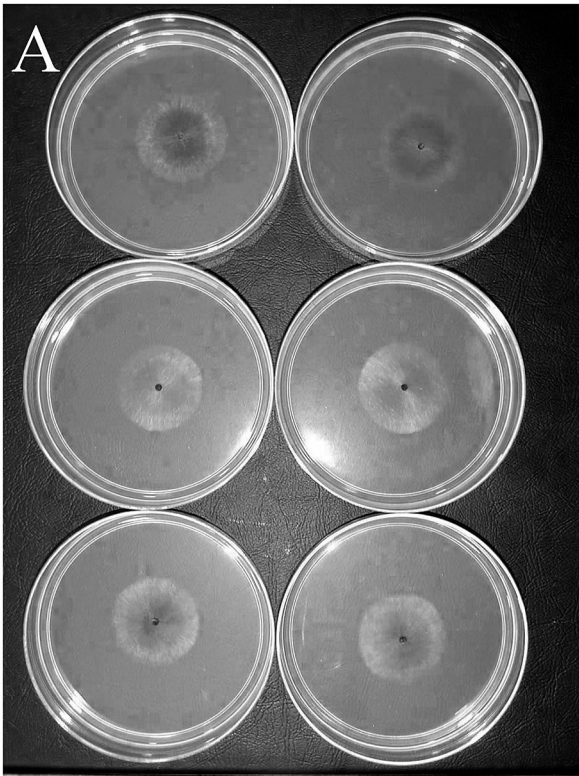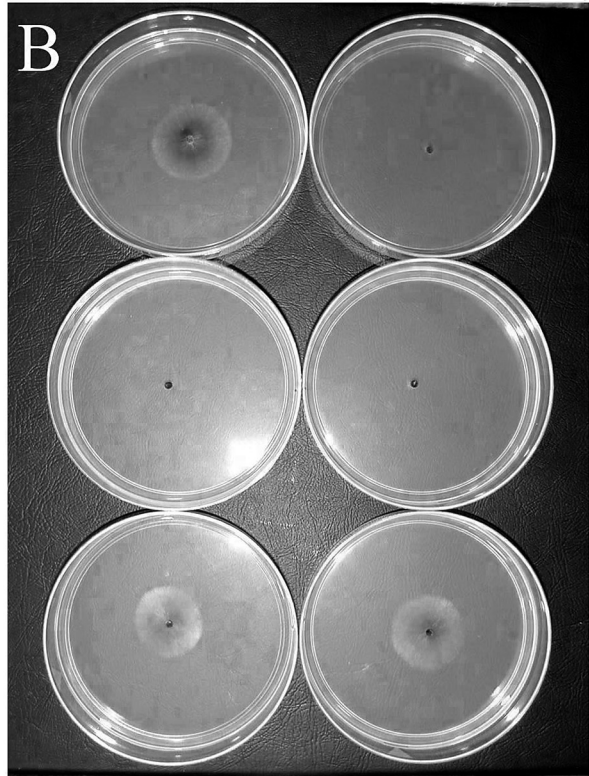

Supplementary Figure 4
