# Supplementary material
Source: PubMed Central journal article supplement (PMC1087798)
Supplement: eukcell_4_3_545__2.pdf [file eukcell_4_3_545__2.pdf]

## SUPPLEMENTARY MATERIALS

### FIGURE LEGENDS

**Supplementary Figure 1.** Alignment of AMP domain amino acid sequences encoded by all *C. heterostrophus* *NPS* and *NPS*-like genes.

Bold letters above alignment indicate positions of 10 conserved motifs named A1—A10 (1). Asterisks indicate the 10 positions that constitute the amino acid specificity-conferring code of the adenylation domains (2). The AMP consensus sequences were mapped onto the *C. heterostrophus* alignment based on the alignment of all sequences represented in Fig. 7 and Supplementary Table 2 and thus vary from the *ChAMP* consensus.

**Supplementary Figure 2.** Alignment of Condensation (C)-Epimerization (E) domain amino acid sequences encoded by all *C. heterostrophus* *NPS* and *NPS*-like genes.

Bold letters above and below alignment show five conserved C motifs and two conserved E motifs, respectively (1). The C and E consensus sequences were mapped onto the *C. heterostrophus* alignment based on the alignment of all sequences represented in Supplementary Fig. 1. and Supplementary Table 2 and thus vary from the *ChC-E* consensus.

**Supplementary Figure 3.** *NPS* deletion construct design and evaluation of integration events.

In transformants, primer pair up/2 and primer pair 3/dn should yield PCR products with DNA from strains with homologous integration of the transforming DNA, while those with ectopic integrations would not, nor would wild type. With homologous integrants, primer pair

up/dn or primer pair 1/4 would yield predicted-sized PCR products that are different in size (in all cases here) from those of wild type. There would be no wild-type bands. If disruption were unsuccessful (i.e., ectopic integrant), primer pair up/dn or primer pair 1/4 would yield wild type bands of predicted size plus a band of predicted size corresponding to the input DNA.

**Supplementary Figure 4.** NPS6 confers resistance to hydrogen peroxide.

Colony growth after three days on non-amended MM (A) and 7mM H<sub>2</sub>O<sub>2</sub> amended MM (B) of wild type strain C5 (top left); *nps6* mutants N6-R-3 (top right), N26-R-9 (middle left), N26-R-10 (middle right) and wild-type progeny, N26-R-11 and N26-R-12 (bottom).

**REFERENCES**

1. **Stachelhaus, T., and M. A. Marahiel.** 1995. Modular structure of peptide synthetases revealed by dissection of the multifunctional enzyme GrsA. *J. Biol. Chem.* **270**:6163-9.
2. **Stachelhaus, T., H. D. Mootz, and M. A. Marahiel.** 1999. The specificity-conferring code of adenylation domains in nonribosomal peptide synthetases. *Chem. Biol.* **6**:493-505.
3. **Kim, M. K., J. H. Jeon, M. Fujita, L. B. Davin, and N. G. Lewis.** 2002. The western red cedar (*Thuja plicata*) 8-8' DIRIGENT family displays diverse expression patterns and conserved monolignol coupling specificity. *Plant Mol. Biol.* **49**:199-214.

**Supplementary Table 1. Real Time PCR: *NPS* gene expression.**

| <i>Actin</i>      | Ave. Ct      | Relative to actin 2 $2^{-\Delta Ct}$ (n x 10 <sup>-2</sup> )* |  |
|-------------------|--------------|---------------------------------------------------------------|--|
| 6 hrs CM          | 18.57 ± 0.29 | 100                                                           |  |
| 20 hrs CM         | 19.81 ± 0.66 | 100                                                           |  |
| 72 hrs CMX        | 22.06 ± 0.21 | 100                                                           |  |
| 120 hrs Fries     | 18.57 ± 0.29 | 100                                                           |  |
| 24 hrs – nitrogen | 20.83 ± 1.12 | 100                                                           |  |

---

| <i>NPS1</i>       | Ave. Ct      | Relative to actin 2 $2^{-\Delta Ct}$ (n x 10 <sup>-2</sup> ) | Fold change relative to 20h |
|-------------------|--------------|--------------------------------------------------------------|-----------------------------|
| 6 hrs CM          | 28.82 ± 0.55 | 0.06200                                                      | 1.30                        |
| 20 hrs CM         | 30.85 ± 0.53 | 0.04760                                                      | 1.00                        |
| 72 hrs CMX        | 35.39 ± 0.91 | 0.00969                                                      | 0.20                        |
| 120 hrs Fries     | 29.54 ± 0.26 | 0.04980                                                      | 1.05                        |
| 24 hrs – nitrogen | 28.35 ± 0.42 | 0.54620                                                      | 11.5                        |

---

| <i>NPS2</i>       | Ave. Ct      | Relative to actin 2 $2^{-\Delta Ct}$ (n x 10 <sup>-2</sup> ) | Fold change relative to 20h |
|-------------------|--------------|--------------------------------------------------------------|-----------------------------|
| 6 hrs CM          | 40.00 ± 0.00 | 0.00003                                                      | N/A                         |
| 20 hrs CM         | 40.00 ± 0.00 | 0.00008                                                      | N/A                         |
| 72 hrs CMX        | 40.00 ± 0.00 | 0.00039                                                      | N/A                         |
| 120 hrs Fries     | 40.00 ± 0.00 | 0.00004                                                      | N/A                         |
| 24 hrs – nitrogen | 40.00 ± 0.00 | 0.00017                                                      | N/A                         |

---

| <i>NPS3</i>       | Ave. Ct      | Relative to actin 2 $2^{-\Delta Ct}$ (n x 10 <sup>-2</sup> ) | Fold change relative to 20h |
|-------------------|--------------|--------------------------------------------------------------|-----------------------------|
| 6 hrs CM          | 28.76 ± 0.44 | 0.06490                                                      | 1.80                        |
| 20 hrs CM         | 31.25 ± 0.81 | 0.03600                                                      | 1.00                        |
| 72 hrs CMX        | 35.05 ± 0.25 | 0.01230                                                      | 0.34                        |
| 120 hrs Fries     | 30.13 ± 0.28 | 0.03320                                                      | 0.90                        |
| 24 hrs – nitrogen | 28.37 ± 0.60 | 0.53800                                                      | 14.9                        |

---

| <i>NPS4</i>       | Ave. Ct      | Relative to actin 2 $2^{-\Delta Ct}$ (n x 10 <sup>-2</sup> ) | Fold change relative to 20h |
|-------------------|--------------|--------------------------------------------------------------|-----------------------------|
| 6 hrs CM          | 29.63 ± 0.54 | 0.03550                                                      | 1.60                        |
| 20 hrs CM         | 31.96 ± 0.45 | 0.02210                                                      | 1.00                        |
| 72 hrs CMX        | 36.75 ± 0.72 | 0.00374                                                      | 0.17                        |
| 120 hrs Fries     | 32.00 ± 0.80 | 0.00905                                                      | 0.40                        |
| 24 hrs – nitrogen | 29.61 ± 0.38 | 0.22760                                                      | 10.3                        |

---

| <i>NPS5</i>       | Ave. Ct      | Relative to actin 2 $2^{-\Delta Ct}$ (n x 10 <sup>-2</sup> ) | Fold change relative to 20h |
|-------------------|--------------|--------------------------------------------------------------|-----------------------------|
| 6 hrs CM          | 30.18 ± 0.99 | 0.02430                                                      | 0.15                        |
| 20 hrs CM         | 34.52 ± 2.18 | 0.00374                                                      | 1.00                        |
| 72 hrs CMX        | 40.00 ± 0.00 | 0.00040                                                      | N/A                         |
| 120 hrs Fries     | 32.48 ± 2.30 | 0.00648                                                      | 1.73                        |
| 24 hrs – nitrogen | 30.44 ± 0.64 | 0.12760                                                      | 34.11                       |

---

| <i>NPS6</i>       | Ave. Ct      | Relative to actin 2 $2^{-\Delta Ct}$ (n x 10 <sup>-2</sup> ) | Fold change relative to 20h |
|-------------------|--------------|--------------------------------------------------------------|-----------------------------|
| 6 hrs CM          | 25.64 ± 0.45 | 0.56140                                                      | 0.47                        |
| 20 hrs CM         | 26.23 ± 1.39 | 1.18100                                                      | 1.00                        |
| 72 hrs CMX        | 30.32 ± 0.58 | 0.32530                                                      | 0.28                        |
| 120 hrs Fries     | 24.24 ± 0.13 | 1.96050                                                      | 1.66                        |
| 24 hrs – nitrogen | 26.90 ± 0.74 | 1.48780                                                      | 1.26                        |

| <i>NPS7</i>       | Ave. Ct      | Relative to actin 2 $2^{-\Delta Ct}$ (n x 10 <sup>-2</sup> ) | Fold change relative to 20h |
|-------------------|--------------|--------------------------------------------------------------|-----------------------------|
| 6 hrs CM          | 29.64 ± 1.95 | 0.03520                                                      | 2.32                        |
| 20 hrs CM         | 29.17 ± 0.78 | 0.15190                                                      | 1.00                        |
| 72 hrs CMX        | 31.19 ± 0.79 | 0.17780                                                      | 1.17                        |
| 120 hrs Fries     | 31.42 ± 4.64 | 0.01350                                                      | 0.09                        |
| 24 hrs – nitrogen | 27.10 ± 1.04 | 1.29380                                                      | 8.52                        |

| <i>NPS8</i>       | Ave. Ct      | Relative to actin 2 $2^{-\Delta Ct}$ (n x 10 <sup>-2</sup> ) | Fold change relative to 20h |
|-------------------|--------------|--------------------------------------------------------------|-----------------------------|
| 6 hrs CM          | 31.02 ± 1.61 | 0.01350                                                      | 1.11                        |
| 20 hrs CM         | 32.51 ± 0.84 | 0.01500                                                      | 1.00                        |
| 72 hrs CMX        | 36.42 ± 0.17 | 0.00473                                                      | 0.35                        |
| 120 hrs Fries     | 31.48 ± 0.88 | 0.01300                                                      | 0.86                        |
| 24 hrs – nitrogen | 29.51 ± 2.02 | 0.24450                                                      | 16.3                        |

| <i>NPS9</i>       | Ave. Ct      | Relative to actin 2 $2^{-\Delta Ct}$ (n x 10 <sup>-2</sup> ) | Fold change relative to 20h |
|-------------------|--------------|--------------------------------------------------------------|-----------------------------|
| 6 hrs CM          | 30.74 ± 0.58 | 0.01640                                                      | 3.88                        |
| 20 hrs CM         | 30.43 ± 1.01 | 0.06370                                                      | 1.00                        |
| 72 hrs CMX        | 34.75 ± 0.12 | 0.01510                                                      | 0.23                        |
| 120 hrs Fries     | 31.72 ± 1.84 | 0.01100                                                      | 0.17                        |
| 24 hrs – nitrogen | 30.17 ± 0.37 | 0.15390                                                      | 2.41                        |

| <i>NPS10</i>      | Ave. Ct      | Relative to actin 2 $2^{-\Delta Ct}$ (n x 10 <sup>-2</sup> ) | Fold change relative to 20h |
|-------------------|--------------|--------------------------------------------------------------|-----------------------------|
| 6 hrs CM          | 40.00 ± 0.00 | 0.00003                                                      | N/A                         |
| 20 hrs CM         | 33.00 ± 4.38 | 0.01070                                                      | 1.00                        |
| 72 hrs CMX        | 40.00 ± 0.00 | 0.00040                                                      | N/A                         |
| 120 hrs Fries     | 39.76 ± 0.62 | 0.00004                                                      | 3.74                        |
| 24 hrs – nitrogen | 36.74 ± 0.45 | 0.00162                                                      | 0.15                        |

| <i>NPS11</i>      | Ave. Ct      | Relative to actin 2 $2^{-\Delta Ct}$ (n x 10 <sup>-2</sup> ) | Fold change relative to 20h |
|-------------------|--------------|--------------------------------------------------------------|-----------------------------|
| 6 hrs CM          | 27.72 ± 0.90 | 0.13270                                                      | 0.80                        |
| 20 hrs CM         | 29.05 ± 0.53 | 0.16540                                                      | 1.00                        |
| 72 hrs CMX        | 34.09 ± 0.82 | 0.02390                                                      | 0.14                        |
| 120 hrs Fries     | 28.86 ± 0.31 | 0.08010                                                      | 0.48                        |
| 24 hrs – nitrogen | 27.89 ± 0.34 | 0.74870                                                      | 4.53                        |

Notes:

6hrs CM: conidia germinated 6 hrs in shaken liquid CM.

20 hrs CM: mycelium grown 20 hrs in shaken liquid CM.

72 hrs CMX: mycelium grown in 20 hrs shaken liquid CM then shifted to solid CMX for 72 hrs conidiation.

120 hrs Fries: mycelium grown in 120 hrs in high iron, still liquid Fries.

24 hrs – Nitrogen: mycelium grown in 20 hrs in shaken liquid CM shifted to MM minus nitrogen.

Ct = cycle time

N/A = no calculation done

\* based on reference 3

**Supplementary Table 2.** Gene names and GI or Accession numbers for 48 *NPS* and *NPS*-like genes included in the phylogenetic analyses, and DNA sequence source for new GenBank accessions.

| <b>Species</b>                     | <b>NPS protein</b> | <b>GI or Acc. number</b> | <b>DNA source for new<br/>Accessions</b> |
|------------------------------------|--------------------|--------------------------|------------------------------------------|
| <i>Acremonium chrysogenum</i>      | PCBAB              | 113315                   |                                          |
| <i>Alternaria alternata</i>        | AMT1               | 6018082                  |                                          |
| <i>Alternaria brassicae</i>        | PSY1               | 32264582                 |                                          |
| <i>Aspergillus fumigatus</i>       | NPS6               | AY928087                 | Af293                                    |
| <i>Aspergillus fumigatus</i>       | NPS10              | AY928090                 | Af293                                    |
| <i>Aspergillus oryzae</i>          | NPS6               | 32400320                 |                                          |
| <i>Aspergillus nidulans</i>        | ACVA               | 113314                   |                                          |
| <i>Aspergillus nidulans</i>        | NPS6               | 49097826                 |                                          |
| <i>Aspergillus nidulans</i>        | NPS10              | 49095988                 |                                          |
| <i>Aspergillus nidulans</i>        | SIDC               | 32709395                 |                                          |
| <i>Aureobasidium pullulans</i>     | SID2               | 17511288                 |                                          |
| <i>Botrytis cinerea</i>            | NPS6               | AY928086                 | B05.10                                   |
| <i>Claviceps purpurea</i>          | PS1                | 4499839                  |                                          |
| <i>Claviceps purpurea</i>          | PS2                | 27525931                 |                                          |
| <i>Cochliobolus carbonum</i>       | HTS1               | 167218                   |                                          |
| <i>Cochliobolus heterostrophus</i> | NPS1               | AY884186                 | C4, ATCC 48331                           |
| <i>Cochliobolus heterostrophus</i> | NPS2               | AY884187                 | C4, ATCC 48331                           |
| <i>Cochliobolus heterostrophus</i> | NPS3               | AY884188                 | C4, ATCC 48331                           |
| <i>Cochliobolus heterostrophus</i> | NPS4               | AY884189                 | C4, ATCC 48331                           |
| <i>Cochliobolus heterostrophus</i> | NPS5               | AY884190                 | C4, ATCC 48331                           |
| <i>Cochliobolus heterostrophus</i> | NPS6               | AY884191                 | C4, ATCC 48331                           |
| <i>Cochliobolus heterostrophus</i> | NPS7               | AY884192                 | C4, ATCC 48331                           |
| <i>Cochliobolus heterostrophus</i> | NPS8               | AY884193                 | C4, ATCC 48331                           |
| <i>Cochliobolus heterostrophus</i> | NPS9               | AY884194                 | C4, ATCC 48331                           |
| <i>Cochliobolus heterostrophus</i> | NPS10              | AY884195                 | C4, ATCC 48331                           |
| <i>Cochliobolus heterostrophus</i> | NPS11              | AY884196                 | C4, ATCC 48331                           |
| <i>Cochliobolus heterostrophus</i> | NPS12              | AY884197                 | C4, ATCC 48331                           |
| <i>Cochliobolus heterostrophus</i> | NPS13              | AY884198                 | C4, ATCC 48331                           |
| <i>Gibberella zeae</i>             | NPS6               | 46115810                 | PH-1 (NRRL 31084)                        |
| <i>Gibberella zeae</i>             | NPS10              | 46124259                 | PH-1 (NRRL 31084)                        |
| <i>Fusarium scirpi</i>             | ESYN1              | 15591913                 |                                          |
| <i>Gibberella moniliformis</i>     | NPS6               | AY928085                 | ATCC 38932 (FGSC 7600)                   |
| <i>Gibberella moniliformis</i>     | NPS10              | AY928089                 | ATCC 38932 (FGSC 7600)                   |
| <i>Hypocrea virens</i>             | TEX1               | 21902204                 |                                          |
| <i>Kallichroma tethys</i>          | PCBAB              | 13398458                 |                                          |
| <i>Leptosphaeria maculans</i>      | MAA1               | 28629055                 |                                          |
| <i>Leptosphaeria maculans</i>      | SIRP               | 46403055                 |                                          |
| <i>Lysobacter lactamgenus</i>      | PCBAB              | 1752727                  |                                          |
| <i>Neurospora crassa</i>           | NPS1               | 28918023                 |                                          |
| <i>Neurospora crassa</i>           | NPS2               | 28921789                 |                                          |
| <i>Neurospora crassa</i>           | NPS6               | 32418018                 |                                          |
| <i>Nocardia lactamdurans</i>       | PCBAB              | 45006                    |                                          |
| <i>Magnaporthe grisea</i>          | NPS6               | AY928088                 | 70-15                                    |
| <i>Magnaporthe grisea</i>          | NPS10              | 38105248                 |                                          |
| <i>Metarhizium anisopliae</i>      | PESA               | 2342600                  |                                          |
| <i>Penicillium chrysogenum</i>     | ACVA               | 3118                     |                                          |
| <i>Schizosaccharomyces pombe</i>   | NPS2               | 6912019                  |                                          |
| <i>Tolypocladium inflatum</i>      | SIMA               | 440168                   |                                          |
| <i>Ustilago maydis</i>             | SID2               | 2731632                  |                                          |
| <i>Ustilago maydis</i>             | NPS10              | 49072928                 |                                          |
